# Supplementary material for: High-resolution cryo-EM of the human CDK-activating kinase for structure-based drug design
Source: PubMed Central journal article supplement (PMC10937634; doi:10.1038/s41467-024-46375-9), 2024-03-13
Supplement: 41467_2024_46375_MOESM1_ESM.pdf [file 41467_2024_46375_MOESM1_ESM.pdf]

## Supplementary Information

### **High-resolution cryo-electron microscopy of the human CDK-activating kinase for structure-based drug design**

Victoria I. Cushing, Adrian F. Koh, Junjie Feng, Kaste Jurgaityte, Alexander Bondke, Sebastian H. B. Kroll, Marion Barbazanges, Bodo Scheiper, Ash K. Bahl, Anthony G. M. Barrett, Simak Ali\*, Abhay Kotecha\*, Basil J. Greber\*

\* Correspondence should be addressed to:

basil.greber@icr.ac.uk; abhay.kotecha@thermofisher.com; simak.ali@imperial.ac.uk

#### **This file contains:**

Supplementary Figures 1-17

Supplementary Tables 1-11

Supplementary Notes 1-2

Supplementary References 1-19

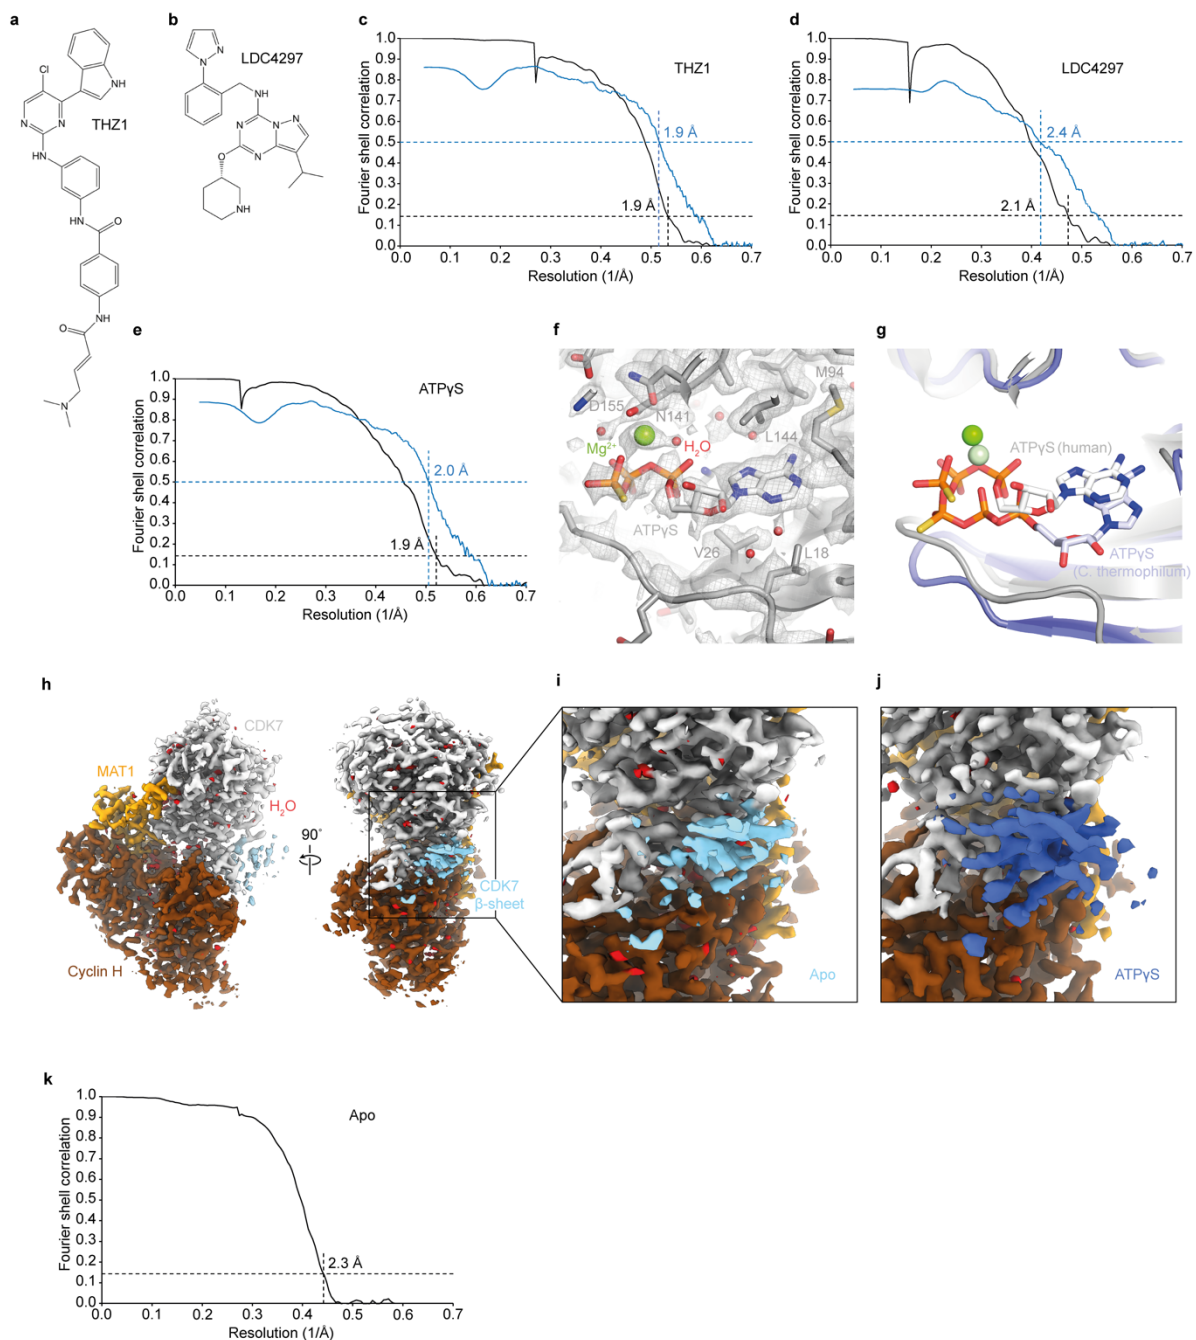

**Supplementary Figure 1 | Proof of principle for high-resolution CAK structure determination and analysis of the structures of apo-CAK and CAK with bound nucleotide. (a)** Chemical structure of the phenylaminopyrimidine-class inhibitor THZ1 that uses a reactive acrylamide group for covalent modification of target kinases. **(b)** Chemical structure of the pyrazolotriazine-class inhibitor LDC4297. **(c-e)** Fourier shell correlation (FSC) curves for the CAK-ATP $\gamma$ S, CAK-THZ1, and CAK-LDC4297 cryo-EM reconstructions. Half-map FSC curves are shown in black, model vs. map FSC curves in blue. Resolutions are estimated according to the FSC = 0.143 criterion for half-maps, and the FSC = 0.5 criterion for model vs. map FSCs<sup>1</sup>. **(f)** Structure of the ATP $\gamma$ S-bound active site of CAK shown with the cryo-EM map. **(g)** ATP $\gamma$ S molecule bound in the active site of human CDK7 (white) compared to adenosine nucleotide

bound in the active site of fungal CDK7 (PDB ID 6Z4X; light blue). **(h)** Cryo-EM map of apo-CAK, with  $\beta$ -sheet in the N-terminal kinase lobe shown in cyan. **(i, j)** Comparison of the density for the  $\beta$ -sheet in the N-terminal kinase lobe in nucleotide-bound and apo-CAK (domain highlighted in cyan and blue, respectively; CAK-ATP $\gamma$ S map low-pass filtered to 2.3 Å resolution). **(k)** FSC curve for the apo-CAK cryo-EM reconstruction. Source data are provided as a Source Data file.

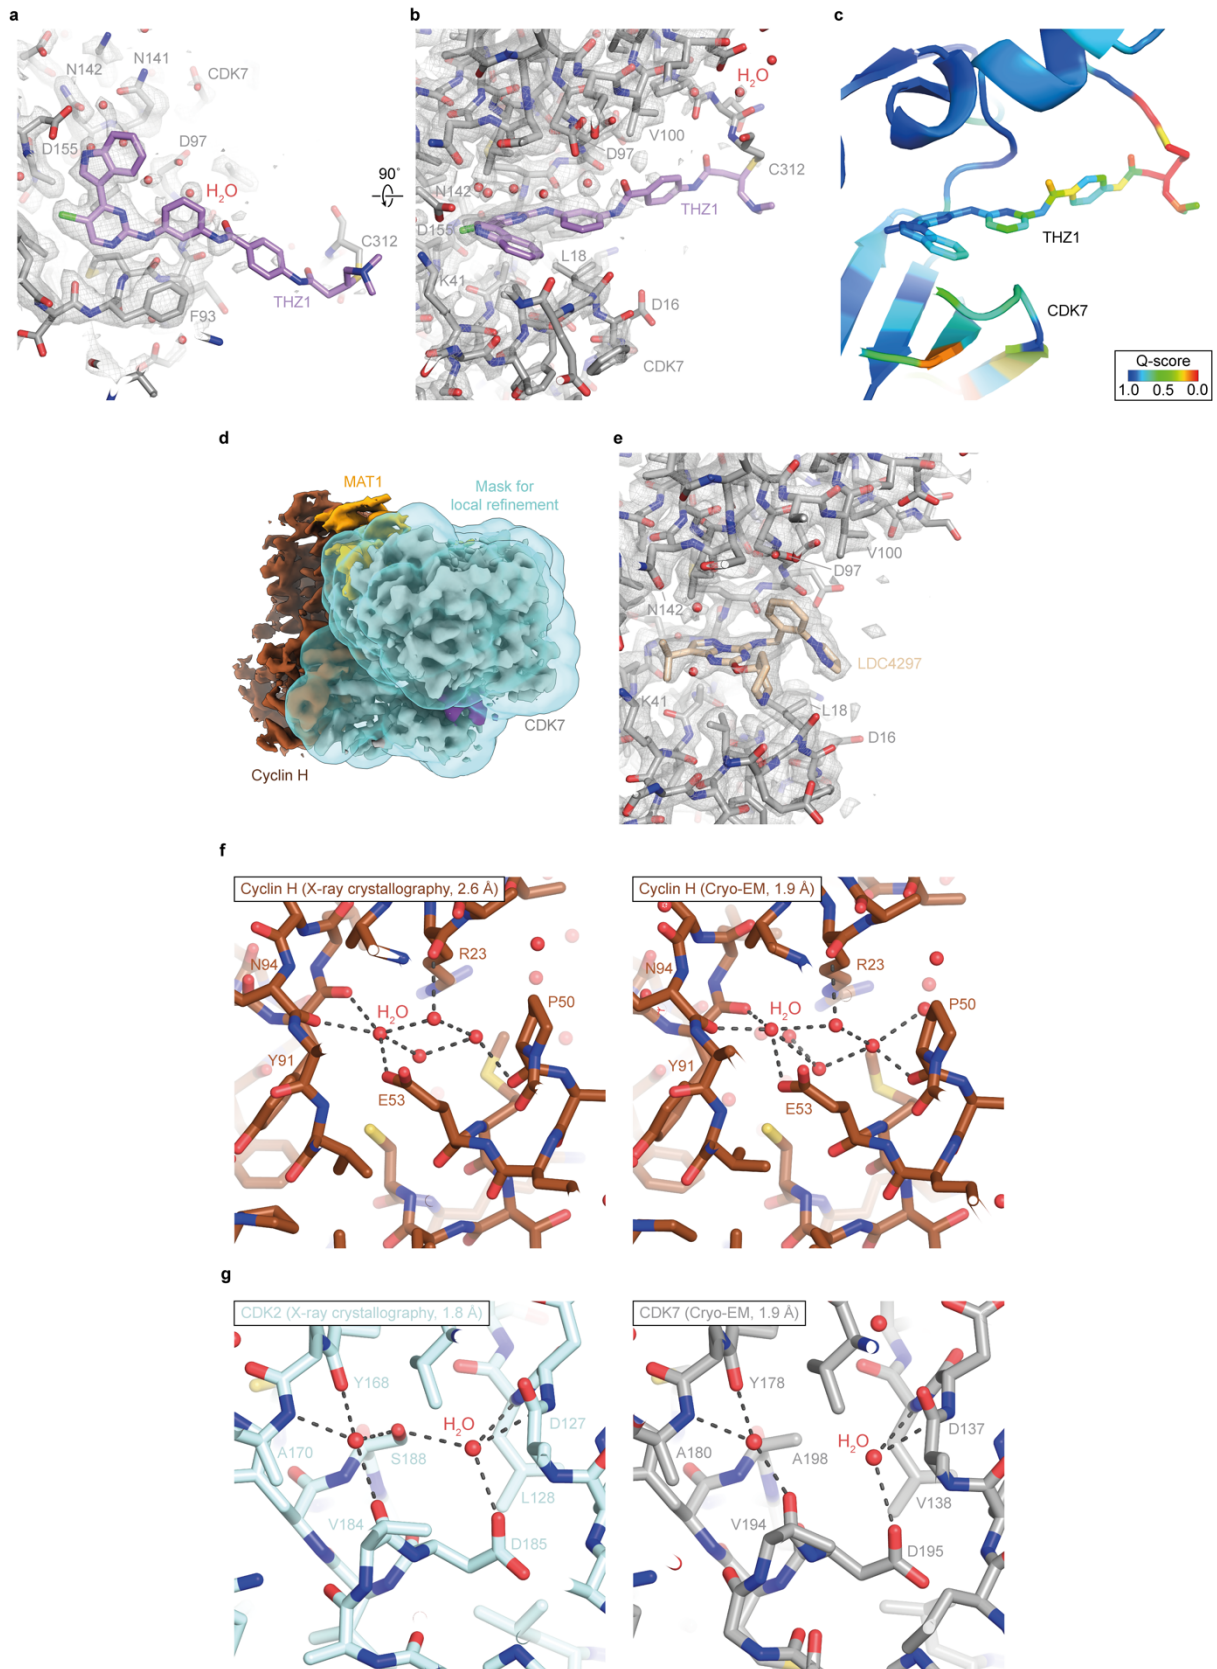

**Supplementary Figure 2 | Analysis of the structures of CAK-THZ1 and CAK-LDC4297.** (a, b) The head group of THZ1 occupies the active site of human CDK7, while the cysteine-reactive portion of the inhibitor protrudes from the active site pocket. The cryo-EM map quality is high for the tightly bound portions of the inhibitor and becomes very weak for the less-tightly

bound components of the inhibitor, indicating structural heterogeneity. **(c)** The variable quality of the THZ1 density is quantified using Q-scores. **(d)** Mask used for masked refinement of a 40 kDa-fragment shown in cyan, CDK7 in grey, MAT1 in orange, and cyclin H in brown. **(e)** Anti-viral compound LDC4297 bound in the active site of CDK7. **(f, g)** Comparison of locations of bound water molecules in X-ray crystal structures of cyclin H (PDB ID 1JKW; 2.6 Å resolution)<sup>2</sup> and CDK2 (PDB ID 6ATH; 1.8 Å resolution)<sup>3</sup> with the water positions identified in our cryo-EM maps for cyclin H and CDK7 (CAK-THZ1 model used).

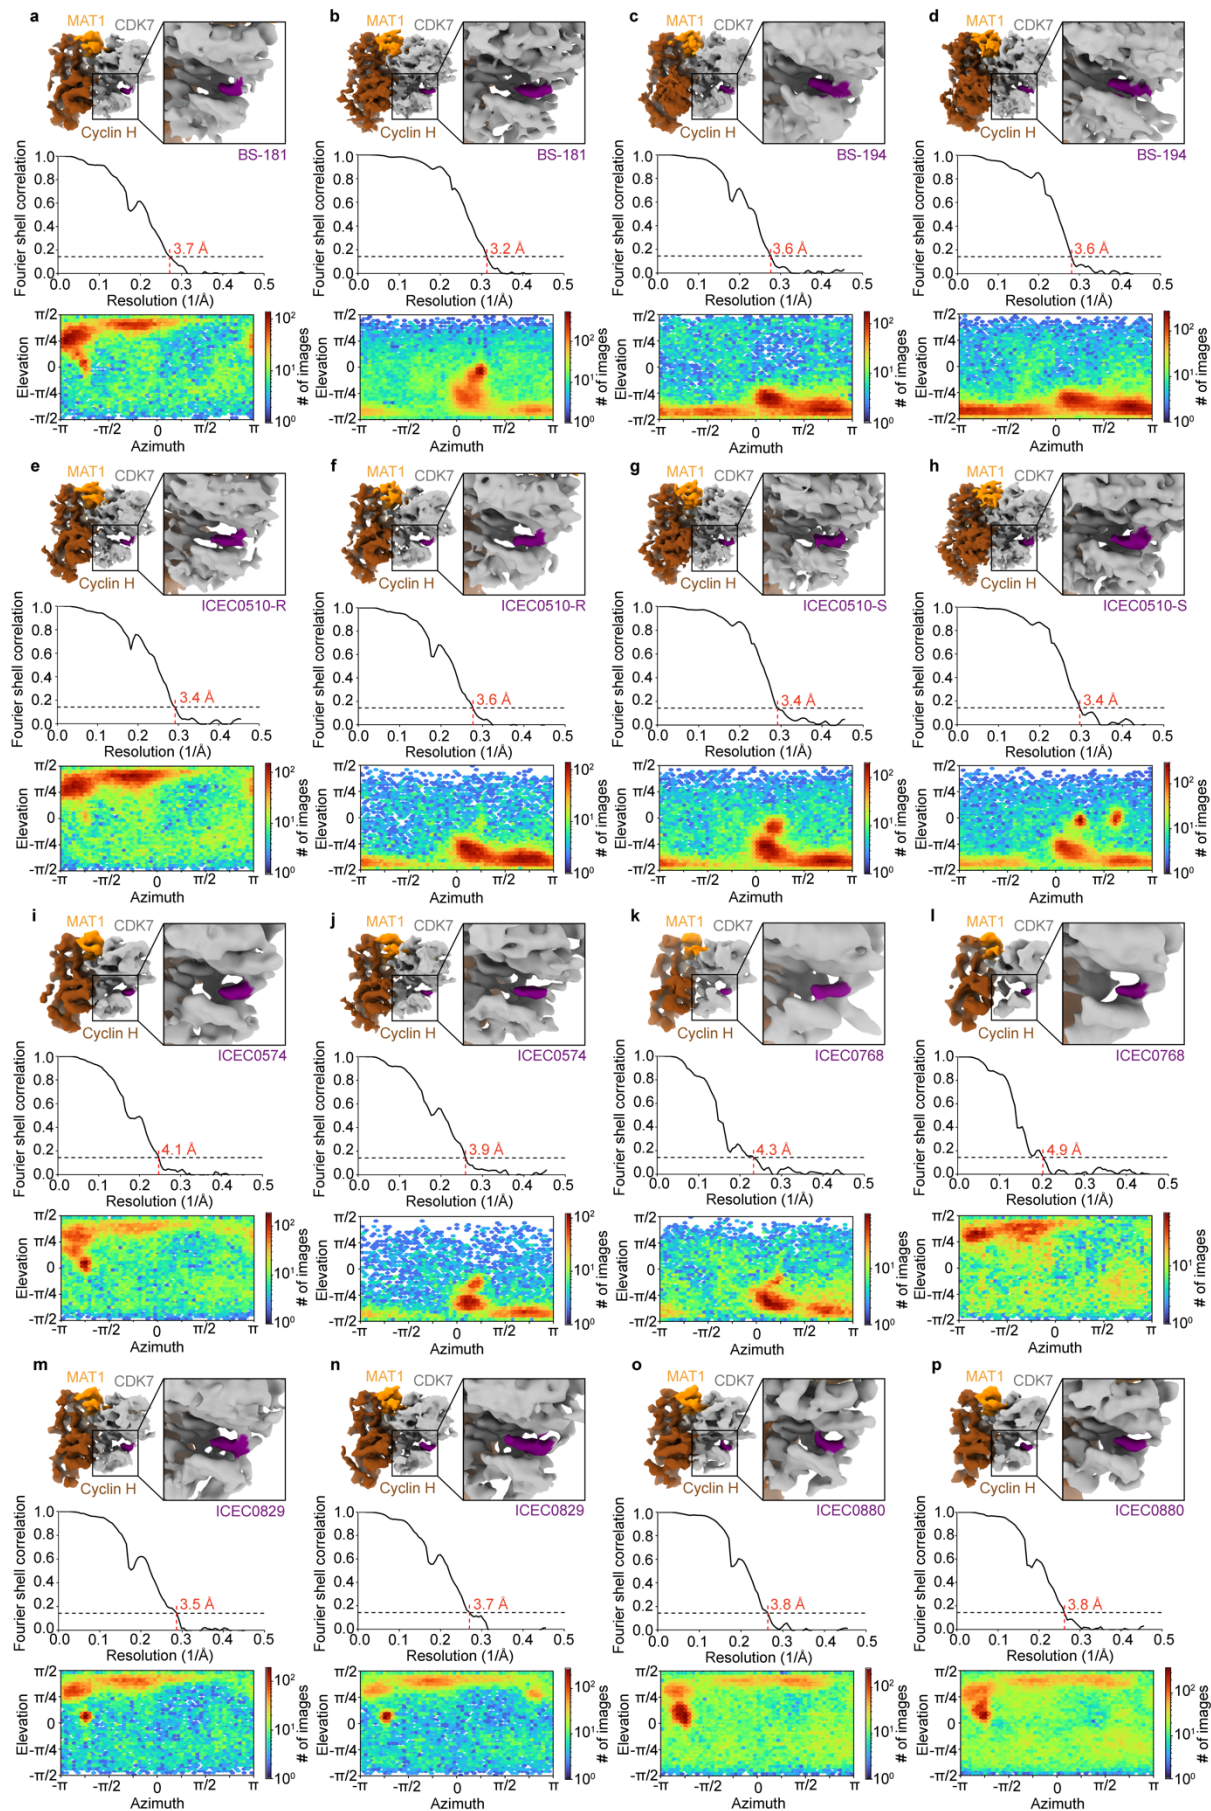

**Supplementary Figure 3 | Live processing of 1-hour Glacios datasets, part 1. (a-p)** Overview of 1-hour Glacios datasets. Top panels show a view of the 3D reconstruction (CDK7 grey, cyclin H brown, MAT1 orange) and a close-up view of the density for bound inhibitors (purple). Middle panels show the resolution according to the FSC = 0.143 threshold<sup>1</sup>. Bottom panels show orientation distribution plots from cryoSPARC streaming refinement. Source data are provided as a Source Data file.

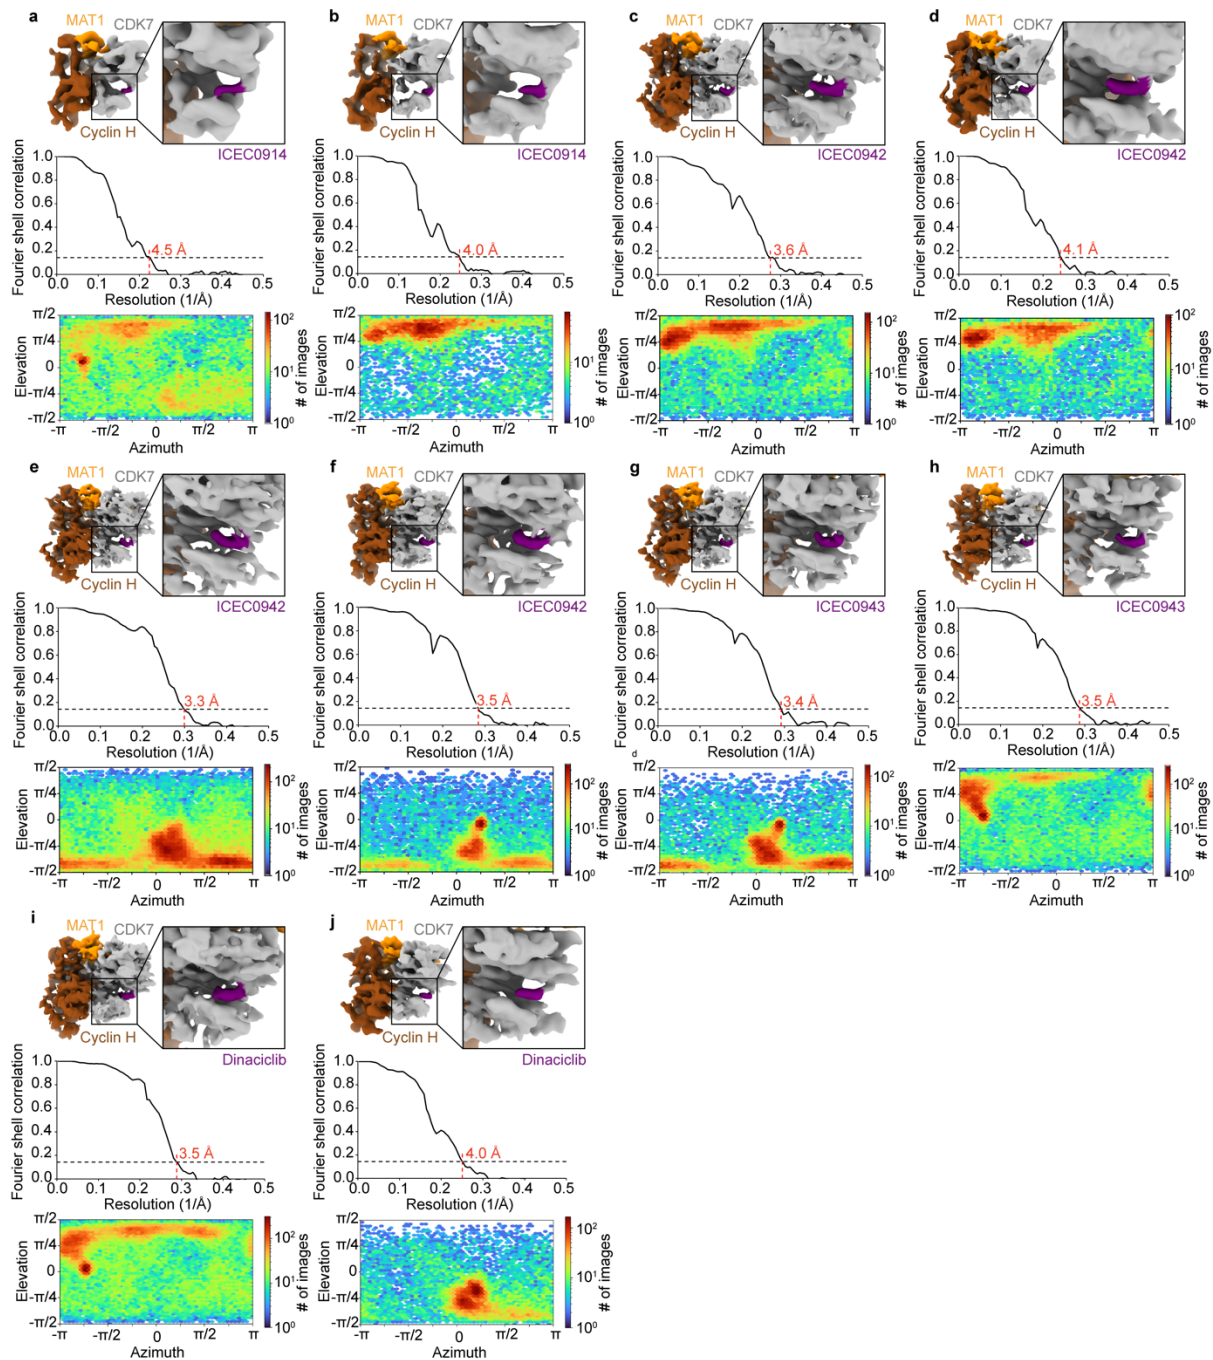

**Supplementary Figure 4 | Live processing of 1-hour Glacios datasets, part 2.** (a-j) Overview of 1-hour Glacios datasets. Top panels show a view of the 3D reconstruction (CDK7 grey, cyclin H brown, MAT1 orange) and a close-up view of the density for bound inhibitors (purple). Middle panels show the resolution according to the FSC = 0.143 threshold<sup>1</sup>. Bottom panels show orientation distribution plots from cryoSPARC streaming refinement. Source data are provided as a Source Data file.



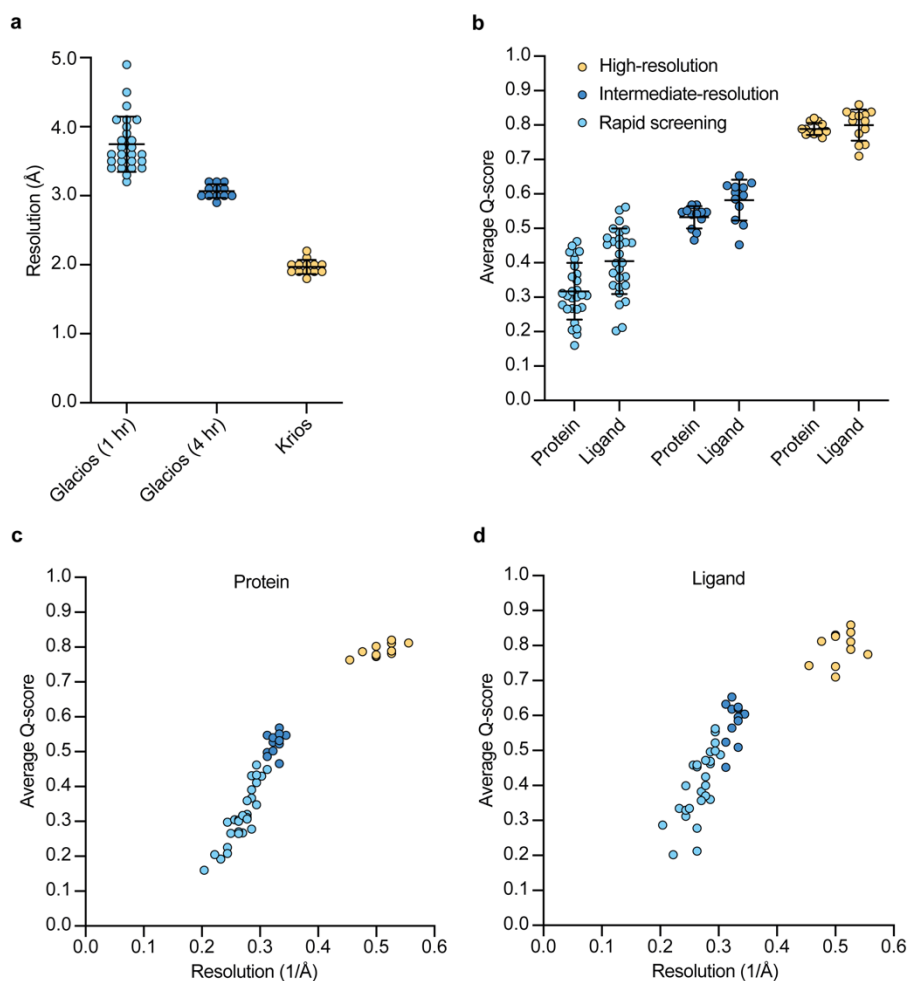

**Supplementary Figure 5 | Resolutions achieved and quantitative analysis of map-model fit using Q-scores.** (a) Resolutions achieved for the three phases of our screening and high-resolution data collection workflow. Mean and standard deviation are indicated. (b) Quantitative analysis of map-model fit for protein and ligand densities for the three phases of our workflow. Mean and standard deviation are indicated. Q-scores<sup>4</sup> for the 1-hour and 4-hour screening output maps were calculated against the high-resolution structures, which serve as a good approximation of the ground truth for the lower-resolution maps. (c, d) Resolution-dependent improvement of Q-scores for protein (c) and ligand (d) densities in datasets collected using our workflow. The number of data points for the graphs corresponds to the number of structures obtained at each screening stage. Source data are provided as a Source Data file.

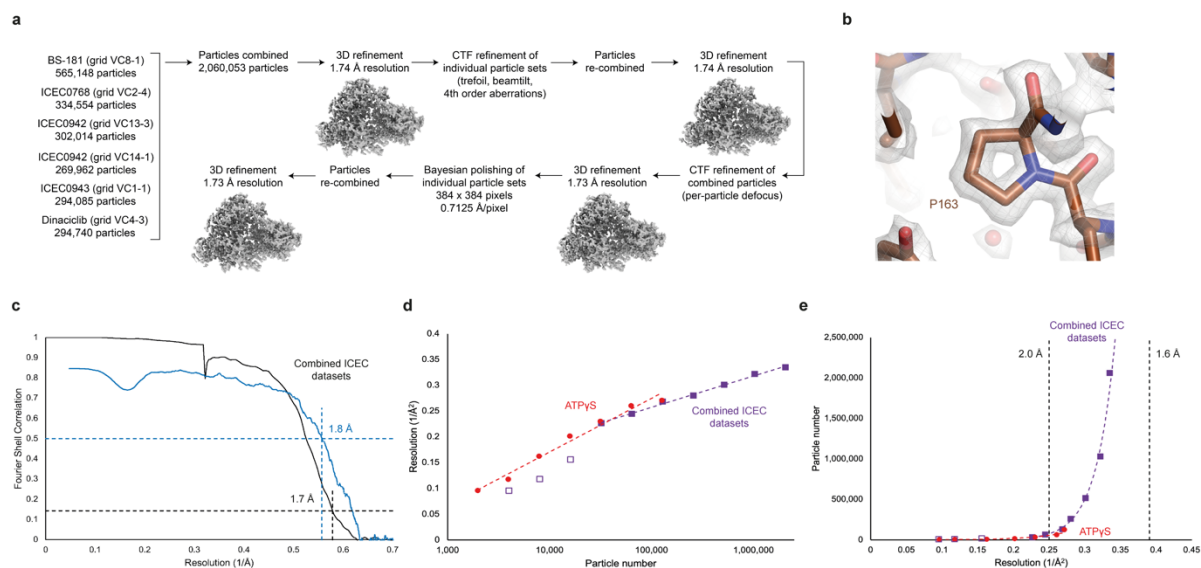

**Supplementary Figure 6 | The 1.7 Å-resolution cryo-EM structure of the human CAK.** (a) High-resolution processing workflow leading to a 1.7 Å-reconstruction of the human CAK with averaged inhibitor density. (b) View of a proline residue (P163 of cyclin H) in the 1.7 Å-resolution reconstruction of the human CAK. (c) FSC curves for the 1.7 Å-reconstruction. The half-map FSC is shown in black, the model vs. map FSC is shown in blue. Resolution values are estimated from the FSC = 0.143 criterion for half-maps, and the FSC = 0.5 criterion for model vs. map FSCs<sup>1</sup>. (d) Henderson-Rosenthal Plot for particle subsets derived by splitting the 1.7 Å-dataset in half 9 consecutive times (purple). At low particle numbers, the data deviate from linearity (outlined purple squares). These points were not used for extrapolation to higher particle numbers (see panel e). Additionally, data for the ATP $\gamma$ S dataset, which reached higher resolutions at low particle numbers, possibly due to the absence of DMSO in the sample buffer, is plotted in red. (e) The data from panel d plotted with particles on a linear scale to visualize the exponential increase in particle number required to reach higher resolution. Source data are provided as a Source Data file.

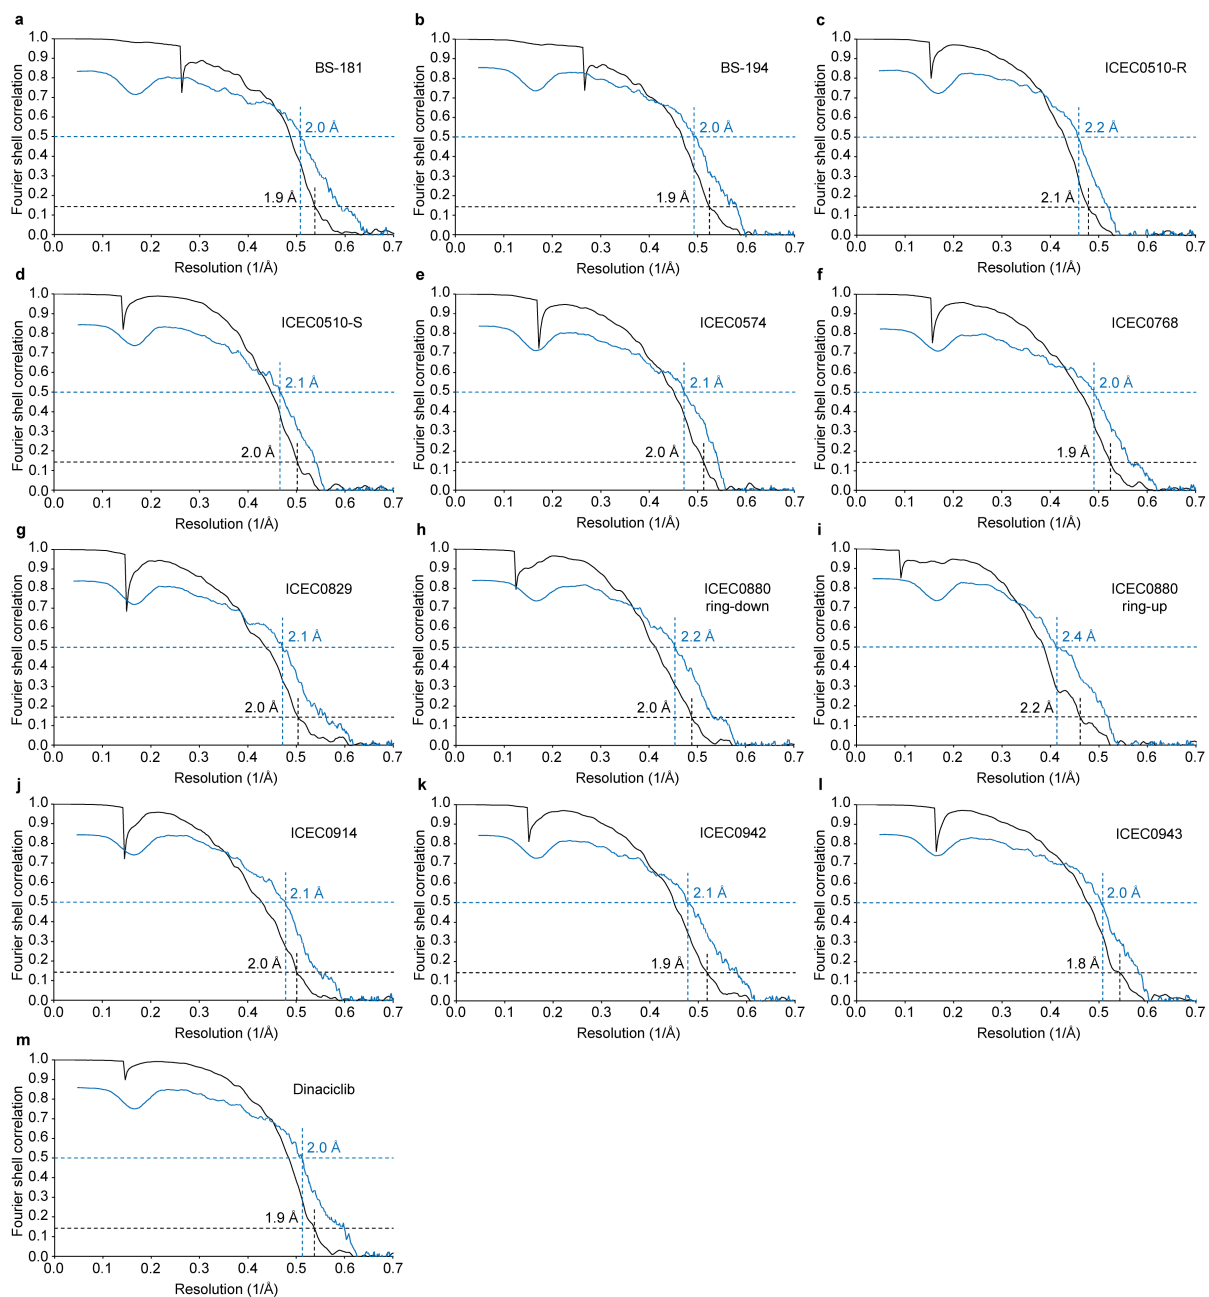

**Supplementary Figure 7 | FSC curves for high-resolution inhibitor-bound structures. (a-m)**

The half-map FSC is shown in black, the model vs. map FSC is shown in blue. Resolution values are estimated from the FSC = 0.143 criterion for half-maps, and the FSC = 0.5 criterion for model vs. map FSCs<sup>1</sup>. Source data are provided as a Source Data file.

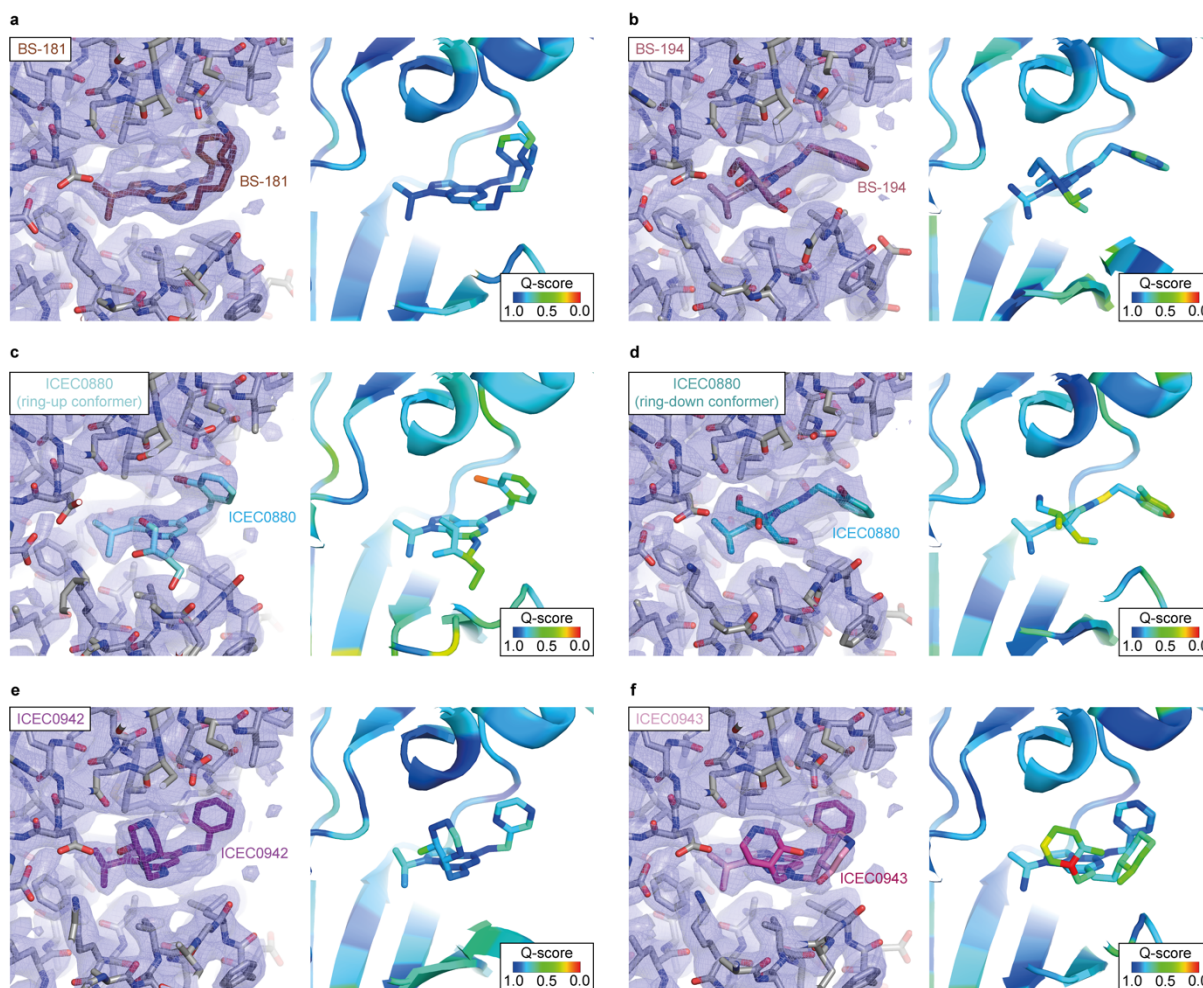

**Supplementary Figure 8 | Structures of pyrazolopyrimidine-type inhibitors bound to CDK7 shown with the corresponding cryo-EM maps and evaluated using Q-scores (part 1).** Panels show the fitted inhibitors in maps filtered to 3 Å resolution to visualize poorly ordered chemical groups (blue, left-hand panels) and inhibitors colored by Q-scores (red to blue, right-hand panels). The molecular environment and high-resolution map fit are shown in Fig. 6 for these inhibitors. (a) BS-181. (b) BS-194. (c, d) ICEC0880 (two different positions correlated with conformational changes in CDK7). (e) The clinical inhibitor ICEC0942. (f) ICEC0943, the enantiomer of ICEC0942 (two conformers differing in the position of the hydroxypiperidine substituent).

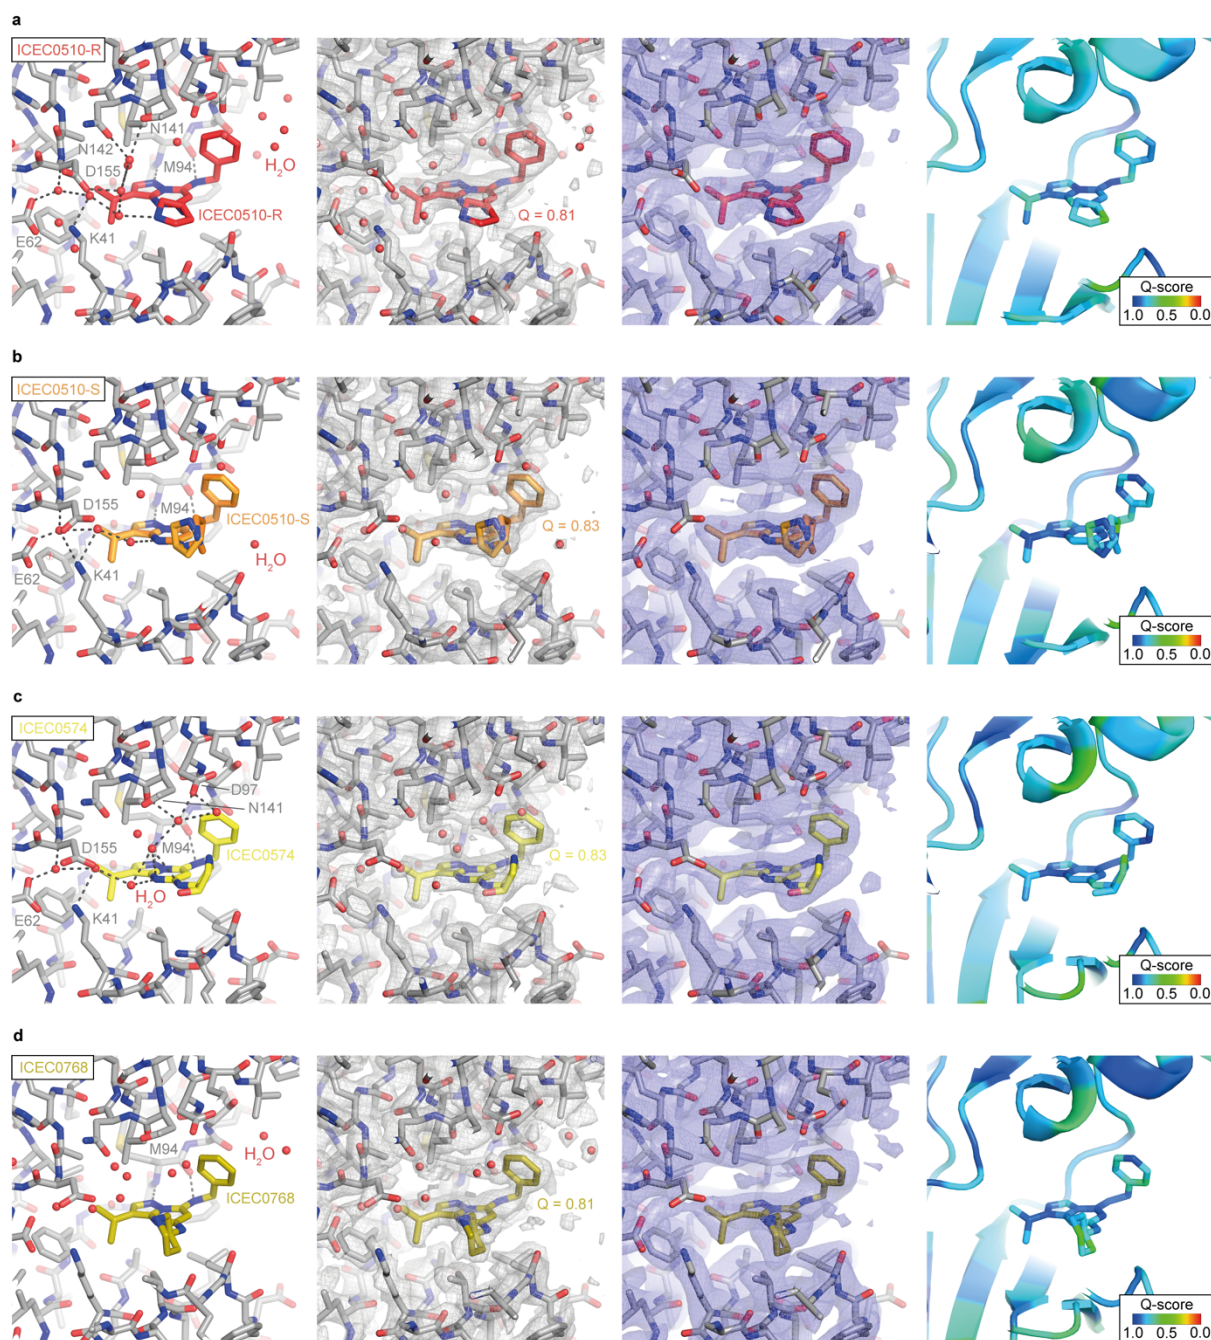

**Supplementary Figure 9 | Structures of pyrazolopyrimidine-type inhibitors bound to CDK7 shown with the corresponding cryo-EM maps and evaluated using Q-scores (part 2).** From left to right, panels show the inhibitors and their hydrogen bonding interactions when bound to CDK7, fitted inhibitors in the post-processed cryo-EM map (grey; average inhibitor Q-scores are indicated), inhibitors fitted in maps filtered to 3 Å resolution to visualize poorly ordered chemical groups (blue), and inhibitors colored by Q-scores (red to blue, right-hand panels). (a) ICEC510-R. (b) ICEC510-S (two conformers). (c) ICEC0574. (d) ICEC0768.

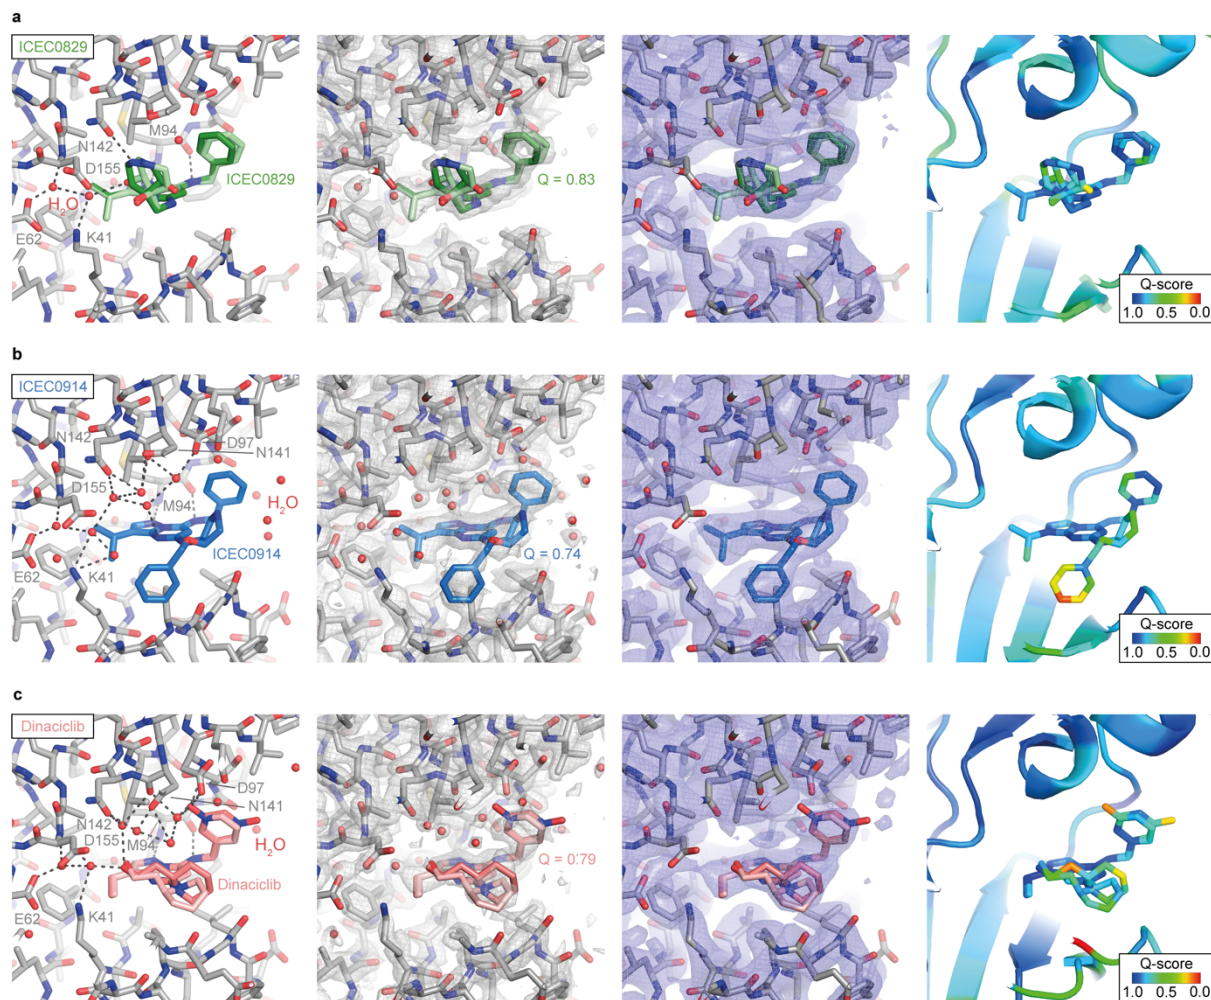

**Supplementary Figure 10 | Structures of pyrazolopyrimidine-type inhibitors bound to CDK7 shown with the corresponding cryo-EM maps and evaluated using Q-scores (part 3).** From left to right, panels show the inhibitors and their hydrogen bonding interactions when bound to CDK7, fitted inhibitors in the post-processed cryo-EM map (grey; average inhibitor Q-scores are indicated), inhibitors fitted in maps filtered to 3 Å resolution to visualize poorly ordered chemical groups (blue), and inhibitors colored by Q-scores (red to blue, right-hand panels). (a) ICEC0829 (two enantiomers). (b) ICEC0914. (c) Dinaciclub (two conformers because the nitroxide position could not be assigned unambiguously).

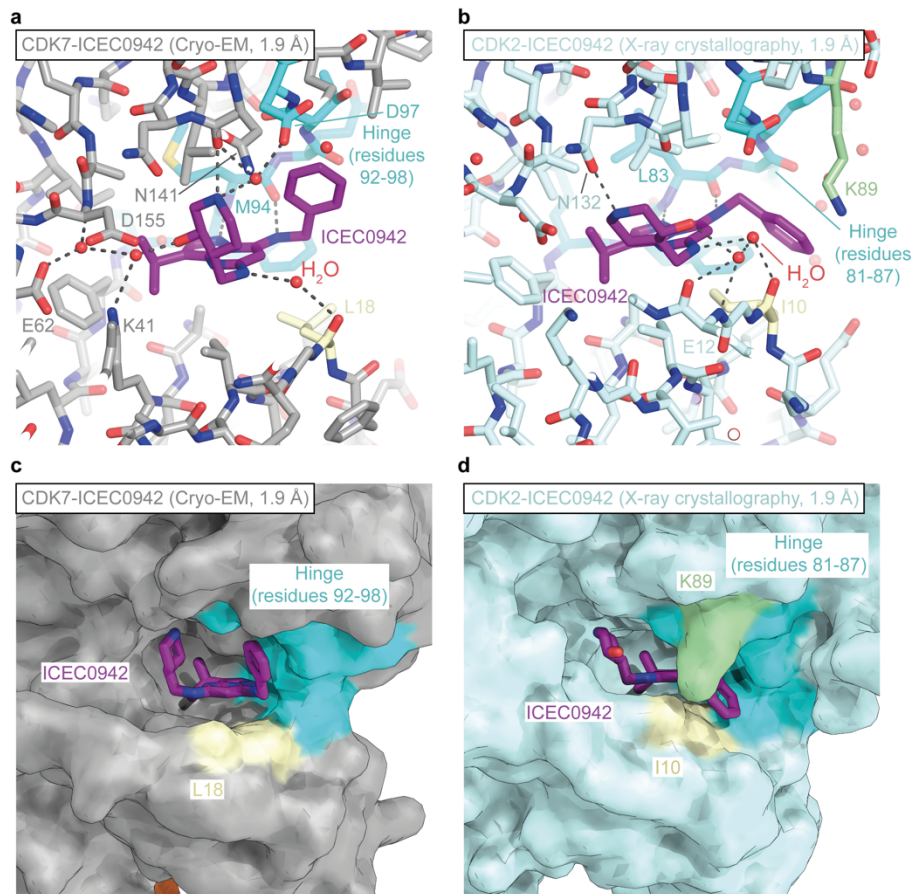

**Supplementary Figure 11 | Comparison of ICEC0942-CDK7 and ICEC0942-CDK2 structures and implications for mechanism of selectivity.** (a) Structure of ICEC0942 (purple) bound to CDK7 (grey; hinge region teal, L18 yellow) in the human CAK. (b) The interactions of ICEC0942 in the CDK2 complex (PDB ID 5JQ5, ref. <sup>5</sup>; CDK2 cyan, hinge region teal, I10 yellow, K89 green). (c, d) Visualization of the active site pockets of CDK7 (c) and CDK2 (d) with bound ICEC0942. A detailed analysis of inhibitor interactions is provided in the main text.

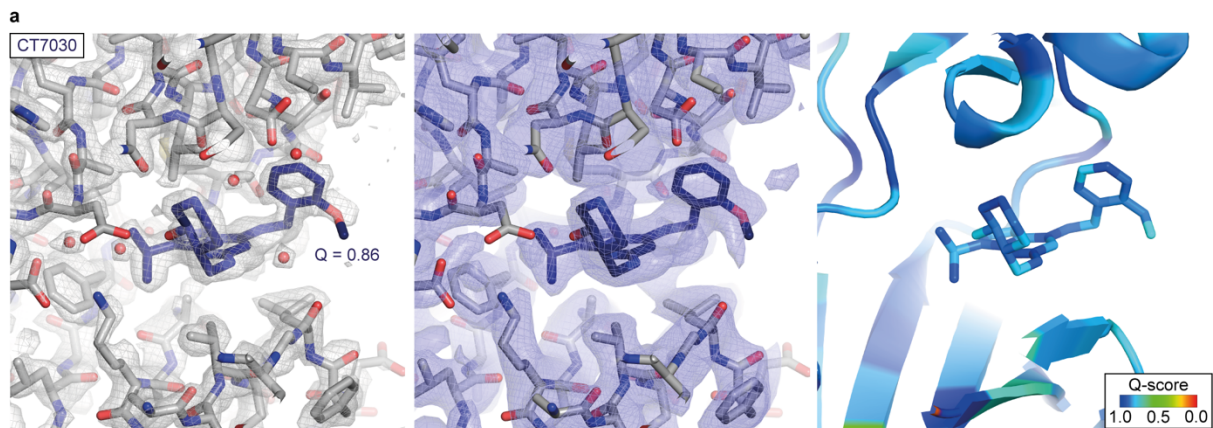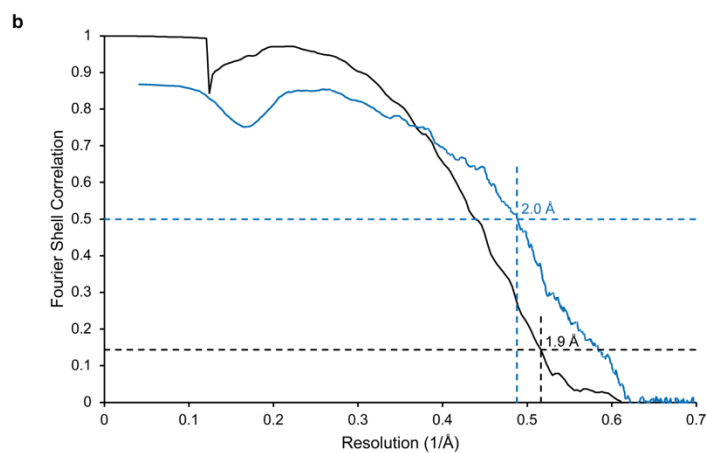

**Supplementary Figure 12 | Structures of CT7030 bound to CDK7 shown with the corresponding cryo-EM maps and FSC curve for this reconstruction. (a)** Details of the CAK-CT7030 structure. Panels show the fitted inhibitor in the post-processed cryo-EM map (grey, left side panel), inhibitor fitted in the map filtered to 3 Å resolution to visualize poorly ordered chemical groups (blue, middle panel), and inhibitor colored by Q-scores (red to blue, right-hand panel). **(b)** FSC curve for the CT7030 cryo-EM structure. The half-map FSC is shown in black, the model vs. map FSC is shown in blue. Resolution values are estimated from the FSC = 0.143 criterion for half-maps, and the FSC = 0.5 criterion for model vs. map FSCs<sup>1</sup>. Source data are provided as a Source Data file.



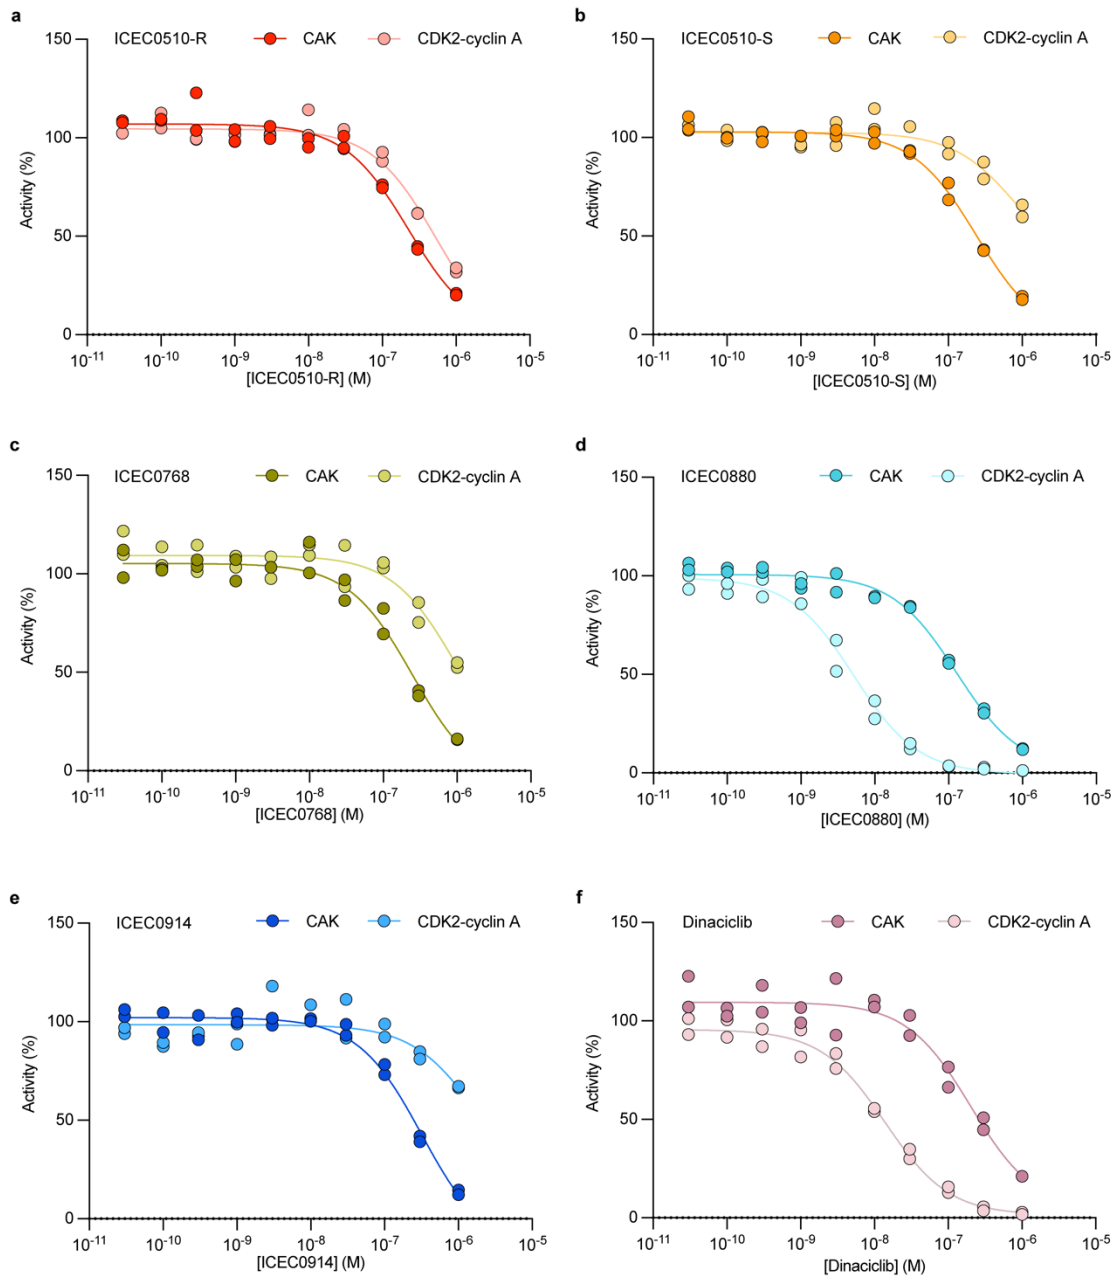

**Supplementary Figure 13 | In-vitro enzyme inhibition assay data.** Plots of the data underlying the values reported in Supplementary Table 2 (n=2, with measurements taken in distinct wells). (a) ICEC0510-R. (b) ICEC0510-S. (c) ICEC0768. (d) ICEC0880. (e) ICEC0914. (f) Dinaciclib. Source data are provided as a Source Data file.

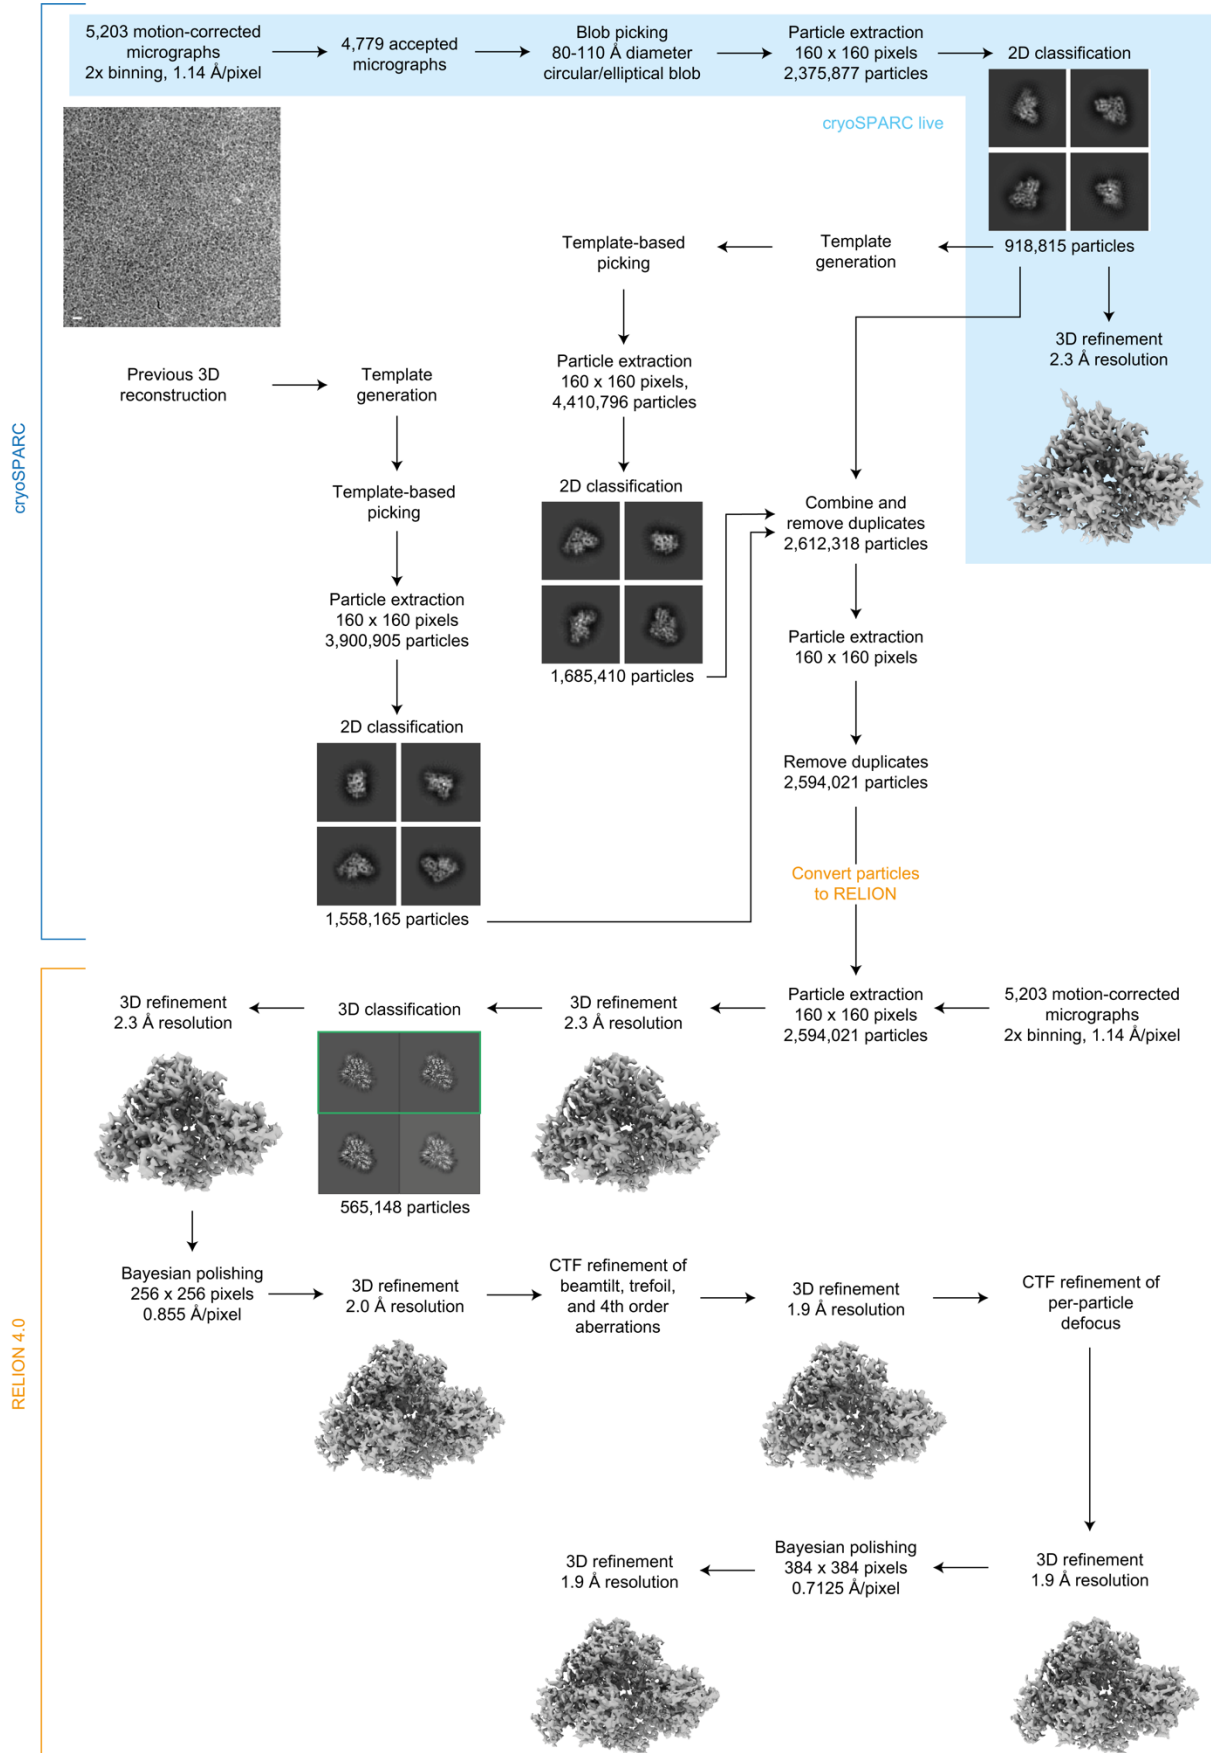

**Supplementary Figure 14 | Data processing strategy.** Processing stages using cryoSPARC and RELION are indicated. Steps performed in cryoSPARC live are shaded in blue. A representative micrograph is shown (scale bar: 100 Å); the contrast of the micrograph was enhanced, and a low-pass filter was applied to facilitate visualization of the particles.

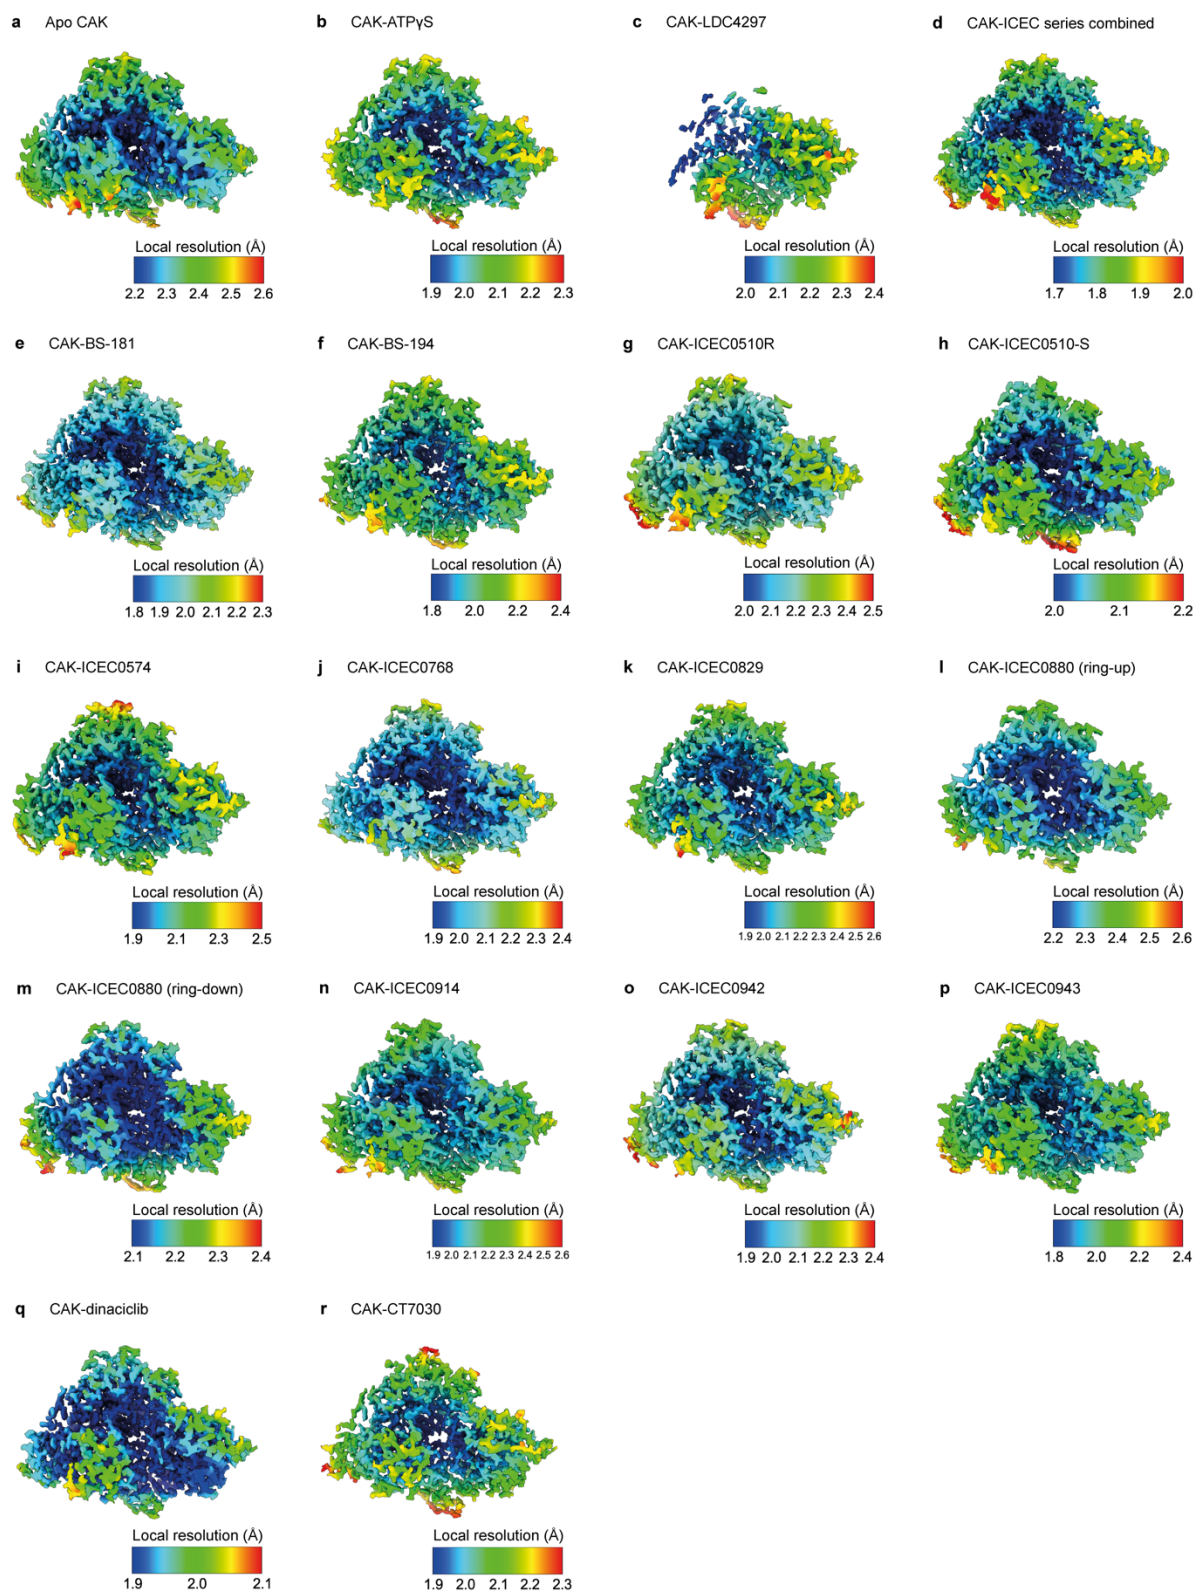

**Supplementary Figure 15 | Local resolution estimates.** (a-r) Local resolution estimates for all high-resolution reconstructions obtained during this study except CAK-THZ1. Local resolutions were computed using RELION. The corresponding depiction for CAK-THZ1 is provided in Fig. 1c.

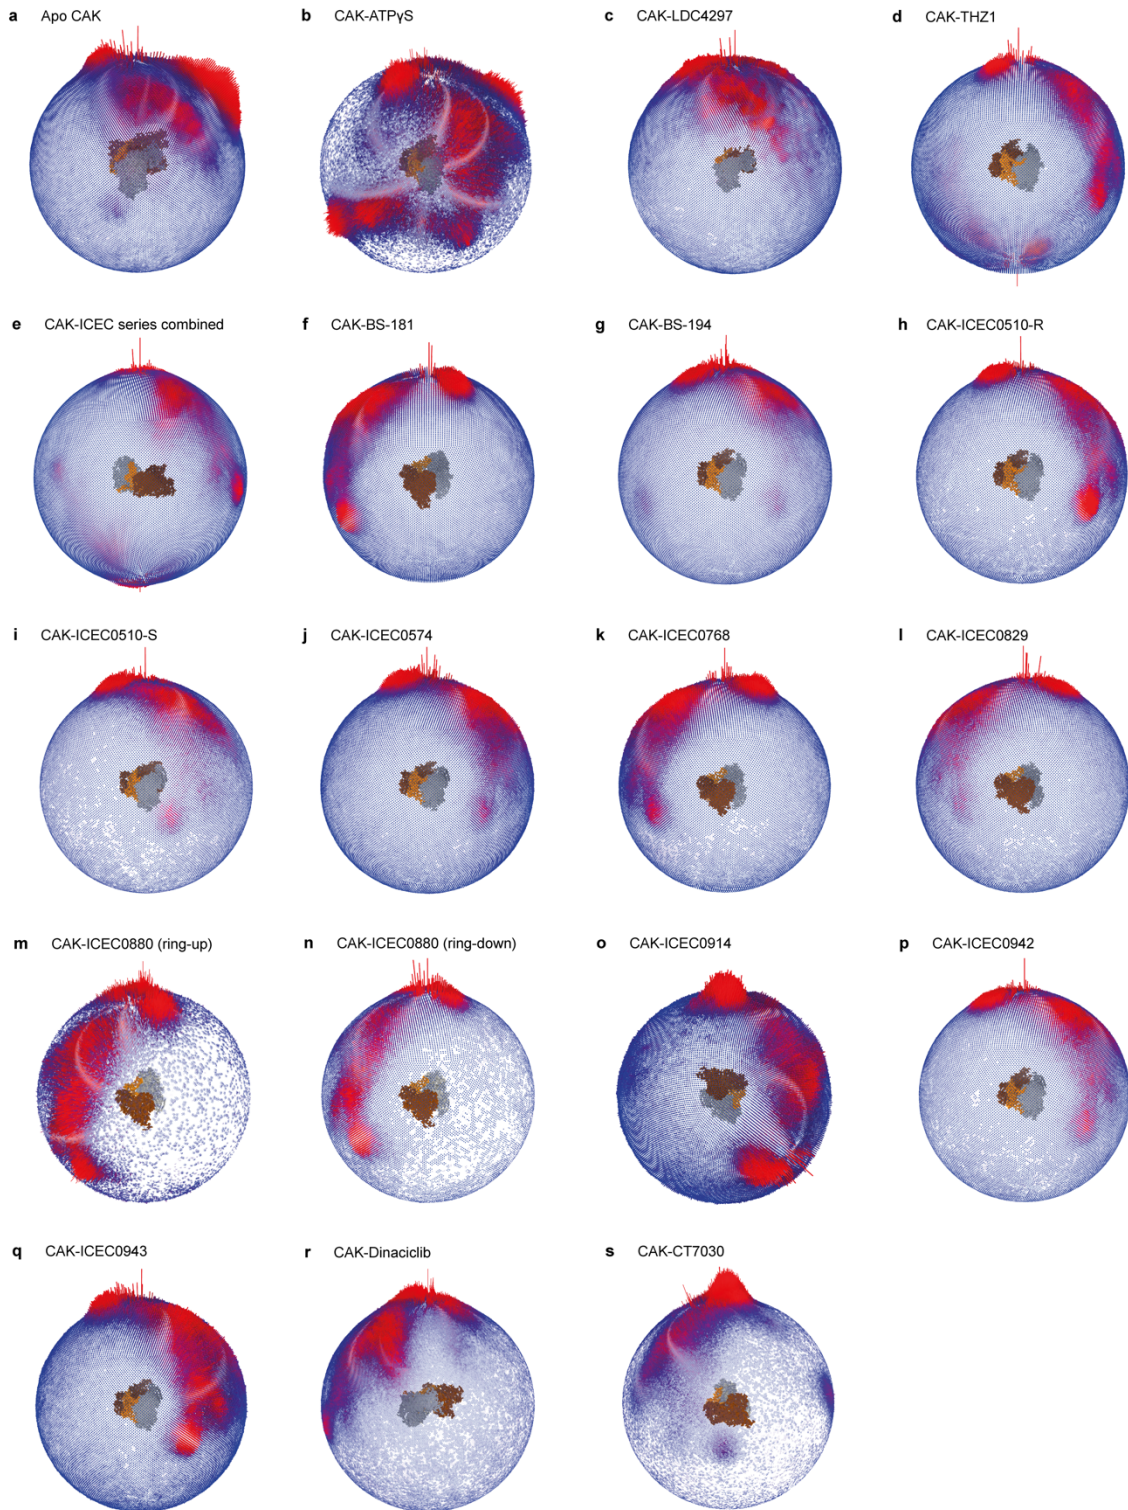

**Supplementary Figure 16 | Orientation distributions.** (a-s) Orientation distribution plots for all high-resolution reconstructions obtained during this study.

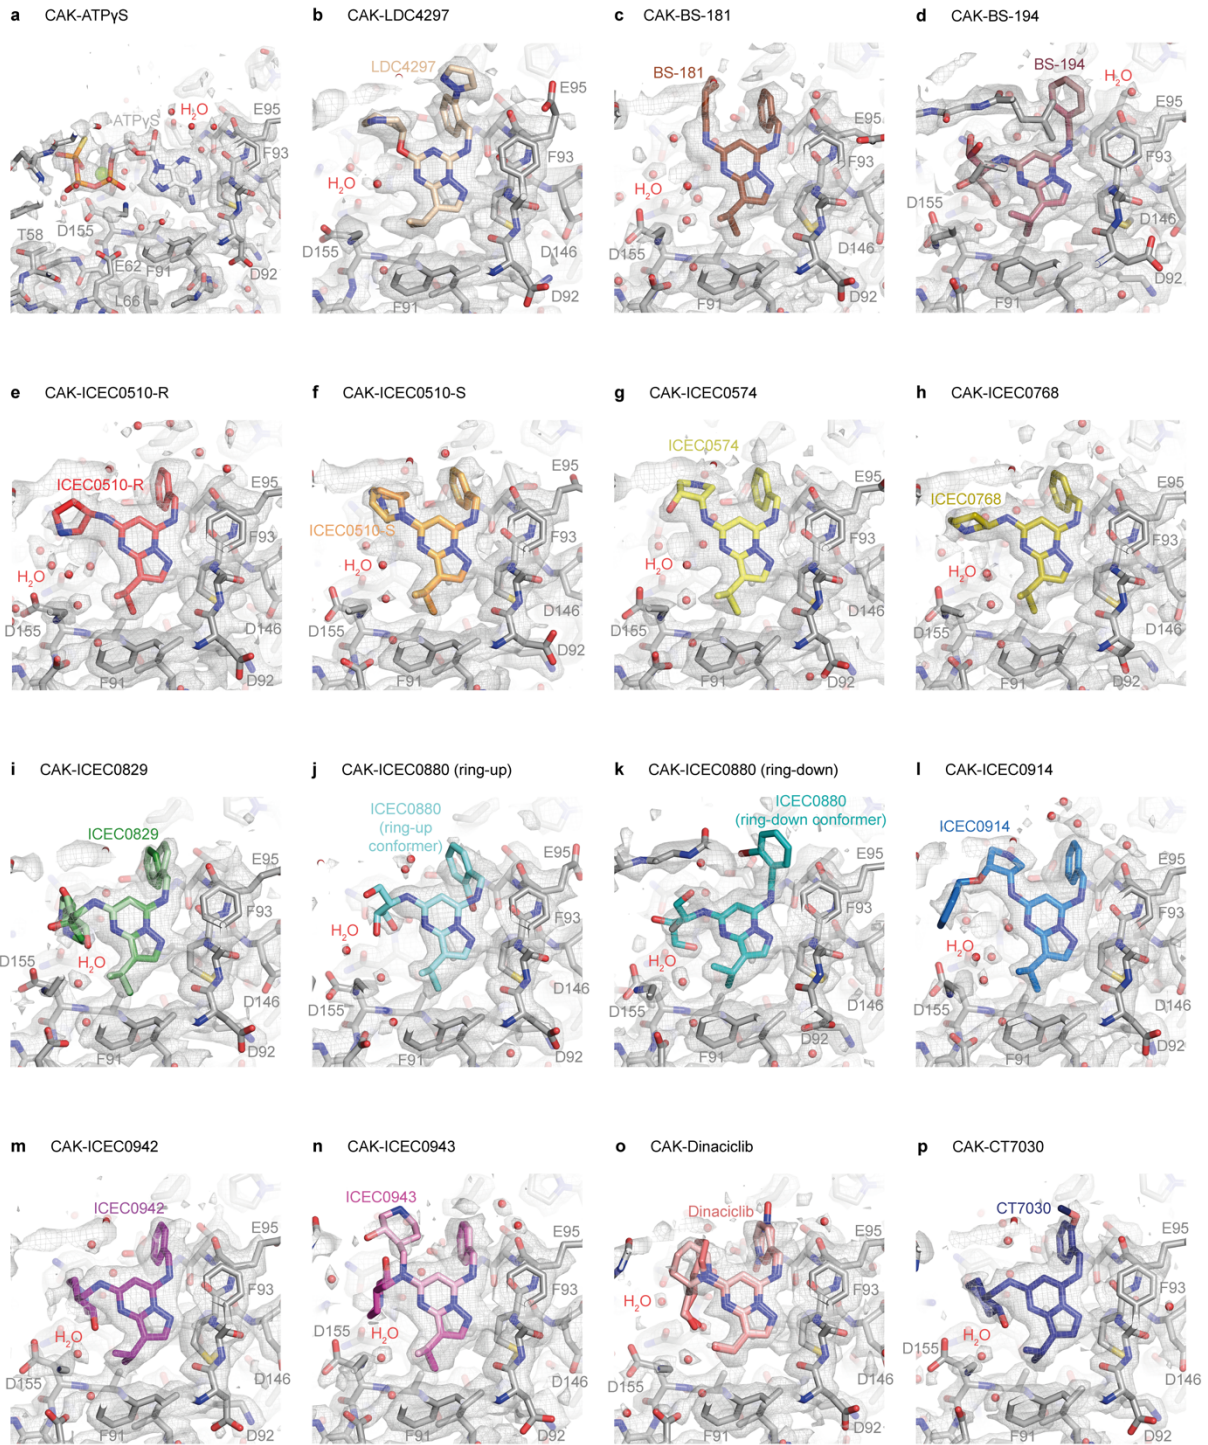

**Supplementary Figure 17 | Additional ligand views. (a-p)** A second view of all high-resolution ligand densities shown in Fig. 6 and Supplementary Figs 1, 2, 9, 10, and 12.

**Supplementary Table 1 | Krios G4 datasets collected during this study.**

| Ligand         | Grid                 | Micrographs collected | Micrographs accepted | Particles refined (live) | Resolution cryoSPARC (Å) <sup>a</sup> | Particles refined (final) | Resolution RELION (Å) |
|----------------|----------------------|-----------------------|----------------------|--------------------------|---------------------------------------|---------------------------|-----------------------|
| apo            | VC15-1               | 5,805                 | 5,036                | 1,402,951                | 2.3                                   | 486,457                   | 2.3                   |
| ATP $\gamma$ S | VC16-3               | 5,781                 | 5,238                | 830,780                  | 2.3                                   | 126,177                   | 1.9                   |
| THZ1           | BG29-1               | 6,029                 | 5,015                | 932,552                  | 2.3                                   | 555,117                   | 1.9                   |
|                | BG29-2               | 6,542                 | 5,553                | 850,654                  | 2.3                                   |                           |                       |
| LDC4297        | BG30-3               | 9,553                 | 6,426                | 835,340                  | 2.5                                   | 273,097                   | 2.1                   |
| BS-181         | VC8-1                | 5,203                 | 4,779                | 918,185                  | 2.3                                   | 565,148                   | 1.9                   |
| BS-194         | VC9-4                | 6,351                 | 5,725                | 1,041,685                | 2.3                                   | 688,511                   | 1.9                   |
| ICEC0510-R     | VC6-4                | 6,309                 | 5,130                | 981,580                  | 2.5                                   | 268,647                   | 2.1                   |
| ICEC0510-S     | VC7-3                | 5,081                 | 3,564                | 916,457                  | 2.3                                   | 233,209                   | 2.0                   |
| ICEC0574       | VC11-4               | 5,132                 | 3,400                | 770,136                  | 2.4                                   | 410,939                   | 2.0                   |
| ICEC0768       | VC2-4                | 5,583                 | 4,038                | 803,921                  | 2.3                                   | 334,554                   | 1.9                   |
| ICEC0829       | VC12-1               | 5,502                 | 3,925                | 688,486                  | 2.4                                   | 253,285                   | 2.0                   |
|                | VC12-3               | 5,079                 | 1,990                | 390,255                  | 2.5                                   | 171,002                   | 2.0                   |
|                | VC12-3 <sup>b</sup>  | 5,167                 | 2,457                | 211,647                  | 2.8                                   | 165,849                   | 2.4                   |
| ICEC0880       | VC5-1                | 5,426                 | 4,173                | 621,371                  | 2.4                                   | 158,290                   | 2.0                   |
|                | State 1 <sup>c</sup> |                       |                      |                          |                                       | 112,809                   | 2.0                   |
|                | State 2 <sup>c</sup> |                       |                      |                          |                                       | 45,481                    | 2.2                   |
| ICEC0914       | VC3-1                | 5,202                 | 3,823                | 709,706                  | 2.3                                   | 237,743                   | 2.0                   |
| ICEC0942       | VC13-3               | 5,231                 | 4,423                | 1,010,580                | 2.4                                   | 302,014                   | 1.9                   |
|                | VC14-1               | 5,367                 | 3,885                | 790,254                  | 2.3                                   | 269,962                   | 1.9                   |
| ICEC0943       | VC1-1                | 5,729                 | 4,649                | 959,204                  | 2.3                                   | 294,085                   | 1.8                   |
| Dinaciclib     | VC4-3                | 5,210                 | 4,561                | 776,307                  | 2.3                                   | 294,740                   | 1.9                   |
| CT7030         | BG51-1               | 10,015                | 5,692                | 895,333                  | 2.3                                   | 459,893                   | 1.9                   |

<sup>a</sup> limited to 2.28 Å (Nyquist frequency) in pre-processing due to 2x binning of input movies

<sup>b</sup> energy filter slit retracted

<sup>c</sup> state 1: ring-down conformation; state 2: ring-up conformation

**Supplementary Table 2 | Enzyme inhibition properties of pyrazolopyrimidine-type used for structure determination.**

Enzyme inhibition properties of selected compounds. Half-maximal inhibitory concentrations (IC<sub>50</sub>) of pyrazolopyrimidine inhibitors used in this study determined by *in-vitro* kinase assays are summarized. Enzyme inhibition raw data for values reported in this work are provided in Supplementary Figure 13.

| Compound   | R1                                                                                  | R2                                                                                  | R3              | CDK7<br>(IC <sub>50</sub> nM) | CDK2<br>(IC <sub>50</sub> nM) | Selectivity | Reference         |
|------------|-------------------------------------------------------------------------------------|-------------------------------------------------------------------------------------|-----------------|-------------------------------|-------------------------------|-------------|-------------------|
| BS181      | -(CH <sub>2</sub> ) <sub>6</sub> NH <sub>2</sub>                                    | Bn                                                                                  | CH <sub>3</sub> | 21                            | 880                           | 42          | Ref. <sup>6</sup> |
| BS194      |    | Bn                                                                                  | CH <sub>3</sub> | 250                           | 3                             | 0.01        | Ref. <sup>7</sup> |
| ICEC0510-R |    | Bn                                                                                  | CH <sub>3</sub> | 220                           | 540                           | 2           | This work         |
| ICEC0510-S |    | Bn                                                                                  | CH <sub>3</sub> | 240                           | 880                           | 4           | This work         |
| ICEC0574   |    | Bn                                                                                  | CH <sub>3</sub> | 27                            | 1290                          | 48          | Ref. <sup>8</sup> |
| ICEC0768   |   | Bn                                                                                  | CH <sub>3</sub> | 250                           | 970                           | 4           | This work         |
| ICEC0829   |  | Bn                                                                                  | CH <sub>3</sub> | 18                            | 2030                          | 113         | Ref. <sup>8</sup> |
| ICEC0880   |  |  | CH <sub>3</sub> | 130                           | 5                             | 0.04        | This work         |
| ICEC0914   |  | Bn                                                                                  | CH <sub>3</sub> | 320                           | >1000                         | -           | This work         |
| ICEC0942   |  | Bn                                                                                  | CH <sub>3</sub> | 41                            | 578                           | 14          | Ref. <sup>5</sup> |
| ICEC0943   |  | Bn                                                                                  | CH <sub>3</sub> | 925                           | >1000                         | -           | Ref. <sup>5</sup> |
| Dinaciclib |  |  | H               | 200                           | 14                            | 0.07        | This work         |

Abbreviations: Bn - benzyl group, -CH<sub>2</sub>-C<sub>6</sub>H<sub>5</sub>



**Supplementary Table 3 | Glacios 2 1-hour screening datasets collected during this study.**  
Grids selected for the next step in the data collection pipeline are marked in bold.

| Ligand     | Grid          | Micrographs collected | Micrographs accepted | Particles refined (live) | Resolution cryoSPARC live (Å) |
|------------|---------------|-----------------------|----------------------|--------------------------|-------------------------------|
| BS-181     | VC8-1         | 452                   | 306                  | 32,405                   | 3.7                           |
|            | <b>VC8-2</b>  | 460                   | 335                  | 57,762                   | 3.2                           |
| BS-194     | VC9-3         | 488                   | 413                  | 40,610                   | 3.6                           |
|            | <b>VC9-4</b>  | 502                   | 421                  | 61,014                   | 3.6                           |
| ICEC0510-R | VC6-3         | 422                   | 318                  | 42,637                   | 3.4                           |
|            | <b>VC6-4</b>  | 511                   | 262                  | 31,111                   | 3.6                           |
| ICEC0510-S | <b>VC7-3</b>  | 452                   | 344                  | 45,237                   | 3.4                           |
|            | VC7-4         | 466                   | 299                  | 40,464                   | 3.4                           |
| ICEC0574   | VC11-3        | 454                   | 278                  | 35,753                   | 4.1                           |
|            | <b>VC11-4</b> | 448                   | 222                  | 17,099                   | 3.9                           |
| ICEC0768   | <b>VC2-1</b>  | 407                   | 276                  | 22,322                   | 4.3                           |
|            | VC2-2         | 457                   | 318                  | 27,998                   | 4.9                           |
| ICEC0829   | <b>VC12-3</b> | 426                   | 240                  | 26,990                   | 3.5                           |
|            | VC12-4        | 423                   | 193                  | 30,776                   | 3.7                           |
| ICEC0880   | <b>VC5-1</b>  | 600                   | 391                  | 51,397                   | 3.8                           |
|            | VC5-2         | 600                   | 482                  | 65,836                   | 3.8                           |
| ICEC0914   | <b>VC3-1</b>  | 458                   | 358                  | 33,750                   | 4.5                           |
|            | VC3-2         | 486                   | 163                  | 17,928                   | 4.1                           |
| ICEC0942   | <b>VC13-1</b> | 634                   | 362                  | 35,220                   | 3.6                           |
|            | VC13-2        | 600                   | 373                  | 24,151                   | 4.1                           |
|            | <b>VC14-1</b> | 464                   | 345                  | 67,854                   | 3.3                           |
|            | VC14-2        | 450                   | 302                  | 31,000                   | 3.5                           |
| ICEC0943   | <b>VC1-1</b>  | 470                   | 310                  | 31,034                   | 3.4                           |
|            | VC1-2         | 452                   | 321                  | 41,690                   | 3.5                           |
| Dinaciclib | <b>VC4-1</b>  | 466                   | 344                  | 57,102                   | 3.5                           |
|            | VC4-2         | 453                   | 317                  | 25,137                   | 4.0                           |

**Supplementary Table 4 | Glacios 2 4-hour screening datasets collected during this study.**

| Ligand     | Grid               | Micrographs collected | Micrographs accepted | Particles refined (live) | Resolution cryoSPARC live (Å) | Particles refined (final) | Resolution RELION (Å) |
|------------|--------------------|-----------------------|----------------------|--------------------------|-------------------------------|---------------------------|-----------------------|
| BS-181     | VC8-2              | 1,686                 | 1,281                | 201,719                  | 3.0                           | 93,194                    | 3.1                   |
| BS-194     | VC9-4              | 1,659                 | 1,326                | 282,212                  | 3.1                           | 55,890                    | 3.2                   |
| ICEC0510-R | VC6-4              | 1,678                 | 1,106                | 176,583                  | 3.1                           | 59,714                    | 3.1                   |
| ICEC0510-S | VC7-3              | 1,558                 | 1,242                | 220,033                  | 2.9                           | 166,785                   | 2.9                   |
| ICEC0574   | VC11-4             | 1,764                 | 953                  | 156,086                  | 3.0                           | 62,893                    | 3.0                   |
| ICEC0768   | VC2-1              | 1,703                 | 1,227                | 191,294                  | 3.0                           | 149,596                   | 3.0                   |
| ICEC0829   | VC12-3             | 1,594                 | 1,110                | 144,402                  | 3.0                           | 60,827                    | 3.0                   |
| ICEC0880   | VC5-1 <sup>a</sup> | 10,576                | 7,907                | 1,232,300                | 3.3                           | 226,221                   | 2.3                   |
| ICEC0914   | VC3-1              | 1,632                 | 1,217                | 145,713                  | 3.0                           | 47,422                    | 3.0                   |
| ICEC0942   | VC13-1             | 1,776                 | 1,007                | 143,912                  | 3.3                           | 62,044                    | 3.2                   |
|            | VC14-1             | 1,658                 | 1,285                | 246,409                  | 3.1                           | 134,727                   | 3.2                   |
| ICEC0943   | VC1-1              | 1,202                 | 783                  | 95,031                   | 2.9                           | 60,500                    | 3.0                   |
| Dinaciclib | VC4-1              | 1,637                 | 1,194                | 160,000                  | 3.2                           | 128,172                   | 3.1                   |

<sup>a</sup> full-size dataset for performance comparison with Krios G4

**Supplementary Table 5 | Cryo-EM data collection, 3D reconstruction, and refinement statistics, part 1.**

|                                                     |                  |                  |                  |
|-----------------------------------------------------|------------------|------------------|------------------|
| <b>Ligand</b>                                       | <b>apo-CAK</b>   | <b>ATPyS</b>     | <b>LDC4297</b>   |
| Microscope                                          | Krios G4         | Krios G4         | Krios G4         |
| Stage type                                          | Autoloader       | Autoloader       | Autoloader       |
| Voltage (kV)                                        | 300              | 300              | 300              |
| Detector                                            | Falcon 4i        | Falcon 4i        | Falcon 4i        |
| Acquisition mode                                    | Counting         | Counting         | Counting         |
| Physical pixel size (Å)                             | 0.57             | 0.57             | 0.57             |
| Defocus range (µm)                                  | 0.8-1.4          | 0.7-1.5          | 0.4-2.0          |
| Electron exposure (e <sup>-</sup> /Å <sup>2</sup> ) | 70               | 70               | 70               |
| <b>Reconstruction</b>                               | <b>EMD-17523</b> | <b>EMD-17511</b> | <b>EMD-17536</b> |
| Software                                            | RELION 4.0       | RELION 4.0       | RELION 4.0       |
| Particles used                                      | 486,457          | 126,177          | 272,469          |
| Box size (pixels)                                   | 256 x 256 x 256  | 384 x 384 x 384  | 256 x 256 x 256  |
| Final pixel size (Å)                                | 0.855            | 0.7125           | 0.855            |
| Accuracy rotations (°)                              | 0.98             | 0.60             | 1.07             |
| Accuracy translations (Å)                           | 0.29             | 0.21             | 0.31             |
| Map resolution (Å)                                  | 2.3              | 1.9              | 2.1              |
| Map resolution range (Å)                            | 2.2-2.6          | 1.9-2.3          | 2.0-2.5          |
| Sphericity                                          | 0.86             | 0.91             | 0.88             |
| Map sharpening B-factor (Å <sup>2</sup> )           | -51              | -18              | -35              |
| <b>Coordinate refinement</b>                        |                  |                  |                  |
| Software                                            | N/A              | PHENIX           | PHENIX-OPLS4     |
| Refinement algorithm                                | N/A              | REAL SPACE       | REAL SPACE       |
| Resolution cutoff (Å)                               | N/A              | 1.9              | 2.1              |
| FSC <sub>model-vs-map</sub> =0.5 (Å)                | N/A              | 2.0              | 2.4              |
| <b>Model</b>                                        | <b>N/A</b>       | <b>PDB-8P6Y</b>  | <b>PDB-8P7L</b>  |
| Number of residues                                  | N/A              | 791              | 358              |
| Protein                                             | N/A              | 630              | 315              |
| Ligand (inhibitor, Mg <sup>2+</sup> )               | N/A              | 3                | 1                |
| Water                                               | N/A              | 158              | 42               |
| B-factors overall                                   | N/A              | 16.67            | 25.55            |
| Protein                                             | N/A              | 16.63            | 25.73            |
| Ligand (inhibitor, Mg <sup>2+</sup> )               | N/A              | 29.05            | 19.27            |
| Water                                               | N/A              | 14.98            | 19.84            |
| R.M.S. deviations                                   |                  |                  |                  |
| Bond lengths (Å)                                    | N/A              | 0.002            | 0.003            |
| Bond angles (°)                                     | N/A              | 0.521            | 0.593            |
| <b>Validation</b>                                   |                  |                  |                  |
| Molprobrity score                                   | N/A              | 1.18             | 1.80             |
| Molprobrity clashscore                              | N/A              | 3.92             | 10.93            |
| Rotamer outliers (%)                                | N/A              | 0.36             | 1.11             |
| C <sub>β</sub> deviations (%)                       | N/A              | 0.00             | 0.00             |
| Ramachandran plot                                   |                  |                  |                  |
| Favored (%)                                         | N/A              | 98.87            | 96.72            |
| Allowed (%)                                         | N/A              | 0.97             | 2.95             |
| Outliers (%)                                        | N/A              | 0.16             | 0.33             |

**Supplementary Table 6. Cryo-EM data collection, 3D reconstruction, and refinement statistics, part 2.**

| <b>Ligand</b>                                       | <b>THZ1<br/>(grid BG29-1)</b> | <b>THZ1<br/>(grid BG29-2)</b> | <b>ICEC series<br/>combined</b> |
|-----------------------------------------------------|-------------------------------|-------------------------------|---------------------------------|
| Microscope                                          | Krios G4                      | Krios G4                      | Krios G4                        |
| Stage type                                          | Autoloader                    | Autoloader                    | Autoloader                      |
| Voltage (kV)                                        | 300                           | 300                           | 300                             |
| Detector                                            | Falcon 4i                     | Falcon 4i                     | Falcon 4i                       |
| Acquisition mode                                    | Counting                      | Counting                      | Counting                        |
| Physical pixel size (Å)                             | 0.57                          | 0.57                          | 0.57                            |
| Defocus range (µm)                                  | 0.4-1.9                       | 0.4-1.8                       | -                               |
| Electron exposure (e <sup>-</sup> /Å <sup>2</sup> ) | 70                            | 70                            | 70                              |
| <b>Reconstruction</b>                               | <b>EMD-17129</b>              | <b>EMD-17522</b>              |                                 |
| Software                                            | RELION 4.0                    | RELION 4.0                    |                                 |
| Particles used                                      | 555,117                       | 2,060,503                     |                                 |
| Box size (pixels)                                   | 384 x 384 x 384               | 384 x 384 x 384               |                                 |
| Final pixel size (Å)                                | 0.7125                        | 0.7125                        |                                 |
| Accuracy rotations (°)                              | 0.67                          | 0.64                          |                                 |
| Accuracy translations (Å)                           | 0.22                          | 0.22                          |                                 |
| Map resolution (Å)                                  | 1.9                           | 1.7                           |                                 |
| Map resolution range (Å)                            | 1.8-2.3                       | 1.7-2.0                       |                                 |
| Sphericity                                          | 0.90                          | 0.88                          |                                 |
| Map sharpening B-factor (Å <sup>2</sup> )           | -28                           | -27                           |                                 |
| <b>Coordinate refinement</b>                        |                               |                               |                                 |
| Software                                            | PHENIX                        | SERVALCAT/<br>REFMAC          |                                 |
| Refinement algorithm                                | REAL SPACE                    | Reciprocal space              |                                 |
| Resolution cutoff (Å)                               | 1.9                           | 1.7                           |                                 |
| FSC <sub>model-vs-map</sub> =0.5 (Å)                | 1.9                           | 1.8                           |                                 |
| <b>Model</b>                                        | <b>PDB-8ORM</b>               | <b>PDB-8P79</b>               |                                 |
| Number of residues                                  | 844                           | 811                           |                                 |
| Protein                                             | 632                           | 630                           |                                 |
| Ligand (inhibitor, Mg <sup>2+</sup> )               | 2                             | 1                             |                                 |
| Water                                               | 210                           | 180                           |                                 |
| B-factors overall                                   | 10.68                         | 33.58                         |                                 |
| Protein                                             | 10.56                         | 33.69                         |                                 |
| Ligand (inhibitor, Mg <sup>2+</sup> )               | 18.73                         | 15.11                         |                                 |
| Water                                               | 11.85                         | 30.60                         |                                 |
| R.M.S. deviations                                   |                               |                               |                                 |
| Bond lengths (Å)                                    | 0.003                         | 0.014                         |                                 |
| Bond angles (°)                                     | 0.536                         | 1.719                         |                                 |
| <b>Validation</b>                                   |                               |                               |                                 |
| Molprobity score                                    | 1.22                          | 1.23                          |                                 |
| Molprobity clashscore                               | 4.40                          | 3.84                          |                                 |
| Rotamer outliers (%)                                | 0.90                          | 0.90                          |                                 |
| C <sub>β</sub> deviations (%)                       | 0.00                          | 0.00                          |                                 |
| Ramachandran plot                                   |                               |                               |                                 |
| Favored (%)                                         | 98.23                         | 97.73                         |                                 |
| Allowed (%)                                         | 1.61                          | 2.10                          |                                 |
| Outliers (%)                                        | 0.16                          | 0.16                          |                                 |

**Supplementary Table 7 | Cryo-EM data collection, 3D reconstruction, and refinement statistics, part 3.**

| <b>Ligand</b>                                       | <b>BS-181</b>    | <b>BS-194</b>    | <b>ICEC0510-R</b> |
|-----------------------------------------------------|------------------|------------------|-------------------|
| Microscope                                          | Krios G4         | Krios G4         | Krios G4          |
| Stage type                                          | Autoloader       | Autoloader       | Autoloader        |
| Voltage (kV)                                        | 300              | 300              | 300               |
| Detector                                            | Falcon 4i        | Falcon 4i        | Falcon 4i         |
| Acquisition mode                                    | Counting         | Counting         | Counting          |
| Physical pixel size (Å)                             | 0.57             | 0.57             | 0.57              |
| Defocus range (µm)                                  | 0.4-1.5          | 0.4-1.8          | 0.4-1.6           |
| Electron exposure (e <sup>-</sup> /Å <sup>2</sup> ) | 70               | 70               | 70                |
| <b>Reconstruction</b>                               | <b>EMD-17509</b> | <b>EMD-17510</b> | <b>EMD-17512</b>  |
| Software                                            | RELION 4.0       | RELION 4.0       | RELION 4.0        |
| Particles used                                      | 565,148          | 688,511          | 268,647           |
| Box size (pixels)                                   | 384 x 384 x 384  | 384 x 384 x 384  | 384 x 384 x 384   |
| Final pixel size (Å)                                | 0.7125           | 0.7125           | 0.7125            |
| Accuracy rotations (°)                              | 0.68             | 0.84             | 0.71              |
| Accuracy translations (Å)                           | 0.23             | 0.25             | 0.23              |
| Map resolution (Å)                                  | 1.9              | 1.9              | 2.1               |
| Map resolution range                                | 1.8-2.3          | 1.8-2.4          | 2.0-2.5           |
| Sphericity                                          | 0.84             | 0.86             | 0.86              |
| Map sharpening B-factor (Å <sup>2</sup> )           | -27              | -26              | -28               |
| <b>Coordinate refinement</b>                        |                  |                  |                   |
| Software                                            | PHENIX           | PHENIX           | PHENIX            |
| Refinement algorithm                                | REAL SPACE       | REAL SPACE       | REAL SPACE        |
| Resolution cutoff (Å)                               | 1.9              | 1.9              | 2.1               |
| FSC <sub>model-vs-map</sub> =0.5 (Å)                | 2.0              | 2.0              | 2.2               |
| <b>Model</b>                                        | <b>PDB-8P6W</b>  | <b>PDB-8P6X</b>  | <b>PDB-8P6Z</b>   |
| Number of residues                                  | 771              | 777              | 759               |
| Protein                                             | 630              | 631              | 630               |
| Ligand (inhibitor, Mg <sup>2+</sup> )               | 2                | 2                | 2                 |
| Water                                               | 139              | 144              | 127               |
| B-factors overall                                   | 7.69             | 22.92            | 22.28             |
| Protein                                             | 7.74             | 23.12            | 22.28             |
| Ligand (inhibitor, Mg <sup>2+</sup> )               | 5.40             | 14.98            | 19.97             |
| Water                                               | 6.19             | 19.09            | 18.98             |
| R.M.S. deviations                                   |                  |                  |                   |
| Bond lengths (Å)                                    | 0.004            | 0.003            | 0.003             |
| Bond angles (°)                                     | 0.640            | 0.561            | 0.577             |
| <b>Validation</b>                                   |                  |                  |                   |
| Molprobrity score                                   | 1.42             | 1.53             | 1.37              |
| Molprobrity clashscore                              | 7.16             | 8.20             | 6.67              |
| Rotamer outliers (%)                                | 0.90             | 0.72             | 0.72              |
| C <sub>β</sub> deviations (%)                       | 0.00             | 0.00             | 0.00              |
| Ramachandran plot                                   |                  |                  |                   |
| Favored (%)                                         | 97.90            | 97.58            | 98.38             |
| Allowed (%)                                         | 1.94             | 2.26             | 1.46              |
| Outliers (%)                                        | 0.16             | 0.16             | 0.16              |

**Supplementary Table 8 | Cryo-EM data collection, 3D reconstruction, and refinement statistics, part 4.**

|                                                     |                   |                  |                  |
|-----------------------------------------------------|-------------------|------------------|------------------|
| <b>Ligand</b>                                       | <b>ICEC0510-S</b> | <b>ICEC0574</b>  | <b>ICEC0768</b>  |
| Microscope                                          | Krios G4          | Krios G4         | Krios G4         |
| Stage type                                          | Autoloader        | Autoloader       | Autoloader       |
| Voltage (kV)                                        | 300               | 300              | 300              |
| Detector                                            | Falcon 4i         | Falcon 4i        | Falcon 4i        |
| Acquisition mode                                    | Counting          | Counting         | Counting         |
| Physical pixel size (Å)                             | 0.57              | 0.57             | 0.57             |
| Defocus range (µm)                                  | 0.4-1.9           | 0.4-1.8          | 0.5-1.7          |
| Electron exposure (e <sup>-</sup> /Å <sup>2</sup> ) | 70                | 70               | 70               |
| <b>Reconstruction</b>                               | <b>EMD-17513</b>  | <b>EMD-17514</b> | <b>EMD-17515</b> |
| Software                                            | RELION 4.0        | RELION 4.0       | RELION 4.0       |
| Particles used                                      | 233,209           | 410,939          | 334,554          |
| Box size (pixels)                                   | 384 x 384 x 384   | 384 x 384 x 384  | 384 x 384 x 384  |
| Final pixel size (Å)                                | 0.7125            | 0.7125           | 0.7125           |
| Accuracy rotations (°)                              | 0.67              | 0.75             | 0.68             |
| Accuracy translations (Å)                           | 0.22              | 0.25             | 0.23             |
| Map resolution (Å)                                  | 2.0               | 2.0              | 1.9              |
| Map resolution range                                | 2.0-2.2           | 1.9-2.7          | 1.9-2.7          |
| Sphericity                                          | 0.92              | 0.84             | 0.84             |
| Map sharpening B-factor (Å <sup>2</sup> )           | -21               | -25              | -24              |
| <b>Coordinate refinement</b>                        |                   |                  |                  |
| Software                                            | PHENIX            | PHENIX           | PHENIX           |
| Refinement algorithm                                | REAL SPACE        | REAL SPACE       | REAL SPACE       |
| Resolution cutoff (Å)                               | 2.0               | 2.0              | 1.9              |
| FSC <sub>model-vs-map</sub> =0.5 (Å)                | 2.1               | 2.1              | 2.0              |
| <b>Model</b>                                        | <b>PDB-8P70</b>   | <b>PDB-8P71</b>  | <b>PDB-8P72</b>  |
| Number of residues                                  | 786               | 746              | 756              |
| Protein                                             | 630               | 630              | 630              |
| Ligand (inhibitor, Mg <sup>2+</sup> )               | 2                 | 2                | 2                |
| Water                                               | 154               | 114              | 124              |
| B-factors overall                                   | 28.33             | 20.78            | 16.54            |
| Protein                                             | 28.58             | 20.92            | 16.61            |
| Ligand (inhibitor, Mg <sup>2+</sup> )               | 17.60             | 13.68            | 15.73            |
| Water                                               | 24.12             | 16.37            | 13.73            |
| R.M.S. deviations                                   |                   |                  |                  |
| Bond lengths (Å)                                    | 0.003             | 0.003            | 0.003            |
| Bond angles (°)                                     | 0.548             | 0.520            | 0.587            |
| <b>Validation</b>                                   |                   |                  |                  |
| Molprobrity score                                   | 1.44              | 1.40             | 1.38             |
| Molprobrity clashscore                              | 8.02              | 7.36             | 6.96             |
| Rotamer outliers (%)                                | 0.90              | 0.72             | 0.54             |
| C <sub>β</sub> deviations (%)                       | 0.00              | 0.00             | 0.00             |
| Ramachandran plot                                   |                   |                  |                  |
| Favored (%)                                         | 98.54             | 98.22            | 98.06            |
| Allowed (%)                                         | 1.29              | 1.62             | 1.78             |
| Outliers (%)                                        | 0.16              | 0.16             | 0.16             |

**Supplementary Table 9 | Cryo-EM data collection, 3D reconstruction, and refinement statistics, part 5.**

| <b>Ligand</b>                                       | <b>ICEC0829</b>  | <b>ICEC0880<br/>(Ring-down)</b> | <b>ICEC0880<br/>(Ring-up)</b> |
|-----------------------------------------------------|------------------|---------------------------------|-------------------------------|
| Microscope                                          | Krios G4         |                                 | Krios G4                      |
| Stage type                                          | Autoloader       |                                 | Autoloader                    |
| Voltage (kV)                                        | 300              |                                 | 300                           |
| Detector                                            | Falcon 4i        |                                 | Falcon 4i                     |
| Acquisition mode                                    | Counting         |                                 | Counting                      |
| Physical pixel size (Å)                             | 0.57             |                                 | 0.57                          |
| Defocus range (µm)                                  | 0.4-1.9          |                                 | 0.4-1.7                       |
| Electron exposure (e <sup>-</sup> /Å <sup>2</sup> ) | 70               |                                 | 70                            |
| <b>Reconstruction</b>                               | <b>EMD-17516</b> | <b>EMD-17518</b>                | <b>EMD-17517</b>              |
| Software                                            | RELION 4.0       | RELION 4.0                      | RELION 4.0                    |
| Particles used                                      | 253,285          | 112,809                         | 45,481                        |
| Box size (pixels)                                   | 384 x 384 x 384  | 384 x 384 x 384                 | 384 x 384 x 384               |
| Final pixel size (Å)                                | 0.7125           | 0.7125                          | 0.7125                        |
| Accuracy rotations (°)                              | 0.73             | 0.68                            | 0.62                          |
| Accuracy translations (Å)                           | 0.24             | 0.22                            | 0.22                          |
| Map resolution (Å)                                  | 2.0              | 2.0                             | 2.2                           |
| Map resolution range                                | 1.9-2.6          | 2.0-2.7                         | 2.1-3.6                       |
| Sphericity                                          | 0.82             | 0.81                            | 0.82                          |
| Map sharpening B-factor (Å <sup>2</sup> )           | -23              | -21                             | -13                           |
| <b>Coordinate refinement</b>                        |                  |                                 |                               |
| Software                                            | PHENIX           | PHENIX                          | PHENIX                        |
| Refinement algorithm                                | REAL SPACE       | REAL SPACE                      | REAL SPACE                    |
| Resolution cutoff (Å)                               | 2.0              | 2.0                             | 2.2                           |
| FSC <sub>model-vs-map</sub> =0.5 (Å)                | 2.1              | 2.2                             | 2.4                           |
| <b>Model</b>                                        | <b>PDB-8P73</b>  | <b>PDB-8P75</b>                 | <b>PDB-8P74</b>               |
| Number of residues                                  | 696              | 708                             | 672                           |
| Protein                                             | 626              | 630                             | 626                           |
| Ligand (inhibitor, Mg <sup>2+</sup> )               | 3                | 2                               | 2                             |
| Water                                               | 67               | 76                              | 44                            |
| B-factors overall                                   | 22.03            | 23.47                           | 28.40                         |
| Protein                                             | 22.20            | 23.48                           | 28.38                         |
| Ligand (inhibitor, Mg <sup>2+</sup> )               | 16.54            | 33.32                           | 40.74                         |
| Water                                               | 14.46            | 18.85                           | 21.49                         |
| R.M.S. deviations                                   |                  |                                 |                               |
| Bond lengths (Å)                                    | 0.004            | 0.003                           | 0.003                         |
| Bond angles (°)                                     | 0.623            | 0.550                           | 0.580                         |
| <b>Validation</b>                                   |                  |                                 |                               |
| Molprobit score                                     | 1.60             | 1.42                            | 1.49                          |
| Molprobit clashscore                                | 8.86             | 7.65                            | 9.19                          |
| Rotamer outliers (%)                                | 1.45             | 0.90                            | 0.91                          |
| C <sub>β</sub> deviations (%)                       | 0.00             | 0.00                            | 0.00                          |
| Ramachandran plot                                   |                  |                                 |                               |
| Favored (%)                                         | 98.37            | 98.54                           | 98.37                         |
| Allowed (%)                                         | 1.47             | 1.29                            | 1.47                          |
| Outliers (%)                                        | 0.16             | 0.16                            | 0.16                          |

**Supplementary Table 10 | Cryo-EM data collection, 3D reconstruction, and refinement statistics, part 6.**

|                                                     |                  |                  |                  |
|-----------------------------------------------------|------------------|------------------|------------------|
| <b>Ligand</b>                                       | <b>ICEC0914</b>  | <b>ICEC0942</b>  | <b>ICEC0943</b>  |
| Microscope                                          | Krios G4         | Krios G4         | Krios G4         |
| Stage type                                          | Autoloader       | Autoloader       | Autoloader       |
| Voltage (kV)                                        | 300              | 300              | 300              |
| Detector                                            | Falcon 4i        | Falcon 4i        | Falcon 4i        |
| Acquisition mode                                    | Counting         | Counting         | Counting         |
| Physical pixel size (Å)                             | 0.57             | 0.57             | 0.57             |
| Defocus range (µm)                                  | 0.4-2.0          | 0.4-1.9          | 0.4-1.7          |
| Electron exposure (e <sup>-</sup> /Å <sup>2</sup> ) | 70               | 70               | 70               |
| <b>Reconstruction</b>                               | <b>EMD-17519</b> | <b>EMD-17508</b> | <b>EMD-17520</b> |
| Software                                            | RELION 4.0       | RELION 4.0       | RELION 4.0       |
| Particles used                                      | 237,743          | 269,962          | 294,085          |
| Box size (pixels)                                   | 384 x 384 x 384  | 384 x 384 x 384  | 384 x 384 x 384  |
| Final pixel size (Å)                                | 0.7125           | 0.7125           | 0.7125           |
| Accuracy rotations (°)                              | 0.73             | 0.69             | 0.67             |
| Accuracy translations (Å)                           | 0.24             | 0.22             | 0.22             |
| Map resolution (Å)                                  | 2.0              | 1.9              | 1.8              |
| Map resolution range                                | 1.9-2.5          | 1.9-2.5          | 1.8-2.4          |
| Sphericity                                          | 0.83             | 0.84             | 0.85             |
| Map sharpening B-factor (Å <sup>2</sup> )           | -24              | -23              | -19              |
| <b>Coordinate refinement</b>                        |                  |                  |                  |
| Software                                            | PHENIX           | PHENIX, OPLS4    | PHENIX           |
| Refinement algorithm                                | REAL SPACE       | REAL SPACE       | REAL SPACE       |
| Resolution cutoff (Å)                               | 2.0              | 1.9              | 1.8              |
| FSC <sub>model-vs-map</sub> =0.5 (Å)                | 2.1              | 2.1              | 2.0              |
| <b>Model</b>                                        | <b>PDB-8P76</b>  | <b>PDB-8P6V</b>  | <b>PDB-8P77</b>  |
| Number of residues                                  | 783              | 770              | 769              |
| Protein                                             | 630              | 630              | 630              |
| Ligand (inhibitor, Mg <sup>2+</sup> )               | 2                | 2                | 2                |
| Water                                               | 151              | 138              | 137              |
| B-factors overall                                   | 18.84            | 21.44            | 21.06            |
| Protein                                             | 18.84            | 21.54            | 21.22            |
| Ligand (inhibitor, Mg <sup>2+</sup> )               | 19.49            | 14.37            | 16.21            |
| Water                                               | 18.93            | 19.06            | 17.19            |
| R.M.S. deviations                                   |                  |                  |                  |
| Bond lengths (Å)                                    | 0.003            | 0.003            | 0.002            |
| Bond angles (°)                                     | 0.572            | 0.586            | 0.504            |
| <b>Validation</b>                                   |                  |                  |                  |
| Molprobrity score                                   | 1.37             | 1.42             | 1.33             |
| Molprobrity clashscore                              | 6.76             | 6.18             | 5.67             |
| Rotamer outliers (%)                                | 0.90             | 1.26             | 1.08             |
| C <sub>β</sub> deviations (%)                       | 0.00             | 0.00             | 0.00             |
| Ramachandran plot                                   |                  |                  |                  |
| Favored (%)                                         | 98.54            | 98.06            | 98.54            |
| Allowed (%)                                         | 1.29             | 1.78             | 1.29             |
| Outliers (%)                                        | 0.16             | 0.16             | 0.16             |



**Supplementary Table 11 | Cryo-EM data collection, 3D reconstruction, and refinement statistics, part 7.**

| <b>Ligand</b>                                       | <b>Dinaciclib</b> | <b>CT7030</b>    |
|-----------------------------------------------------|-------------------|------------------|
| Microscope                                          | Krios G4          | Krios G4         |
| Stage type                                          | Autoloader        | Autoloader       |
| Voltage (kV)                                        | 300               | 300              |
| Detector                                            | Falcon 4i         | Falcon 4i        |
| Acquisition mode                                    | Counting          | Counting         |
| Physical pixel size (Å)                             | 0.57              | 0.57             |
| Defocus range (µm)                                  | 0.4-1.8           | 0.3-1.8          |
| Electron exposure (e <sup>-</sup> /Å <sup>2</sup> ) | 70                | 70               |
| <b>Reconstruction</b>                               | <b>EMD-17521</b>  | <b>EMD-17754</b> |
| Software                                            | RELION 4.0        | RELION 4.0       |
| Particles used                                      | 294,740           | 176,991          |
| Box size (pixels)                                   | 384 x 384 x 384   | 384 x 384 x 384  |
| Final pixel size (Å)                                | 0.7125            | 0.7125           |
| Accuracy rotations (°)                              | 0.60              | 0.58             |
| Accuracy translations (Å)                           | 0.21              | 0.19             |
| Map resolution (Å)                                  | 1.9               | 1.9              |
| Map resolution range                                | 1.8-2.1           | 1.9-2.3          |
| Sphericity                                          | 0.91              | 0.84             |
| Map sharpening B-factor (Å <sup>2</sup> )           | -21               | -18              |
| <b>Coordinate refinement</b>                        |                   |                  |
| Software                                            | PHENIX            | PHENIX           |
| Refinement algorithm                                | REAL SPACE        | REAL SPACE       |
| Resolution cutoff (Å)                               | 1.9               | 1.9              |
| FSC <sub>model-vs-map</sub> =0.5 (Å)                | 2.0               | 2.0              |
| <b>Model</b>                                        | <b>PDB-8P78</b>   | <b>PDB-8PLZ</b>  |
| Number of residues                                  | 802               | 796              |
| Protein                                             | 630               | 630              |
| Ligand (inhibitor, Mg <sup>2+</sup> )               | 2                 | 2                |
| Water                                               | 170               | 164              |
| B-factors overall                                   | 16.39             | 19.71            |
| Protein                                             | 16.45             | 19.81            |
| Ligand (inhibitor, Mg <sup>2+</sup> )               | 16.95             | 14.72            |
| Water                                               | 14.42             | 17.64            |
| R.M.S. deviations                                   |                   |                  |
| Bond lengths (Å)                                    | 0.003             | 0.004            |
| Bond angles (°)                                     | 0.596             | 0.743            |
| <b>Validation</b>                                   |                   |                  |
| Molprobrity score                                   | 1.33              | 1.25             |
| Molprobrity clashscore                              | 5.57              | 4.80             |
| Rotamer outliers (%)                                | 0.72              | 0.90             |
| C <sub>β</sub> deviations (%)                       | 0.00              | 0.00             |
| Ramachandran plot                                   |                   |                  |
| Favored (%)                                         | 97.90             | 98.22            |
| Allowed (%)                                         | 1.94              | 1.62             |
| Outliers (%)                                        | 0.16              | 0.16             |

**Supplementary Table 12 | Results of UV-vis and LC-MS verification of ICEC-series compounds and CT7030.**

| <b>Ligand</b> | <b>(M+H)<sup>+</sup><br/>expected<br/>(Da)</b> | <b>(M+H)<sup>+</sup><br/>observed<br/>(Da)</b> | <b>UV-vis<br/>purity<br/>(%)</b> | <b>LC-MS<br/>purity<br/>(%)</b> | <b>Compound<br/>purity<br/>(%)</b> |
|---------------|------------------------------------------------|------------------------------------------------|----------------------------------|---------------------------------|------------------------------------|
| BS-181        | 381.2763                                       | 381.2763                                       | >95                              | >95                             | >95                                |
| BS-194        | 386.2187                                       | 386.2187                                       | >95                              | >95                             | >95                                |
| ICEC0510-R    | 351.2291                                       | 351.2291                                       | >95                              | >95                             | >95                                |
| ICEC0510-S    | 351.2291                                       | 351.2295                                       | >95                              | >95                             | >95                                |
| ICEC0574      | 367.2243                                       | 367.2242                                       | >95                              | >95                             | >95                                |
| ICEC0768      | 365.2453                                       | 365.2453                                       | 94                               | >95                             | >95                                |
| ICEC0829      | 411.2506                                       | 411.2505                                       | 78                               | 83                              | 83                                 |
| ICEC0880      | 464.1293                                       | 464.1274                                       | 95                               | 90                              | 95                                 |
| ICEC0914      | 457.2710                                       | 457.2716                                       | 95                               | 95                              | 95                                 |
| ICEC0943      | 395.2555                                       | 395.2555                                       | >95                              | >95                             | >95                                |
| CT7030        | 425.2660                                       | 425.2673                                       | 91                               | 87                              | 91                                 |

## Supplementary Note 1. Comparison of 200 kV Glacios 2 and 300 kV Krios G4 instrument performance

While most high-resolution structures deposited to the Electron Microscopy Data Resource (<http://www.emdataresource.org>) have been determined from data collected on high-end, 300 kV electron microscopes, more accessible 200 kV microscopes equipped with autoloaders and direct electron detectors are increasingly applied to determination of published structures and atomic models. Their applicability to a variety of specimens, including small soluble complexes<sup>9,10</sup> and small membrane proteins<sup>11</sup>, and their ability to achieve better than 2 Å resolution on ideal – i.e. symmetrical, rigid, and often large – targets<sup>12,13</sup> have been demonstrated. However, there is a scarcity of direct comparisons between the results obtained using 200 kV and 300 kV instruments on the exact same specimen.

To address this question and provide a more systematic comparison, we determined the structure of the CDK-activating kinase bound to an inhibitor (see main text) from 4,173 good micrographs (count after removal of poor-quality micrographs) collected on a 300 kV Krios G4 cryo-TEM equipped with a cold-FEG, a Selectris X energy filter, and a Falcon 4i direct electron detector. Using a combination of cryoSPARC<sup>14</sup> and RELION<sup>15</sup> for image processing, we were able to reconstruct a 3D map at 2.0 Å from these data (Fig. 3a, c). Having verified the ability to achieve high resolution from this specimen, we transferred the same grid to a 200 kV Glacios 2 cryo-TEM equipped with a Selectris X energy filter and a Falcon 4i direct electron detector and acquired 7,907 good micrographs (count after removal of poor-quality micrographs). The energy filter and detector were thus identical, while the electron source and the optics were different between these datasets. From this latter setup, we achieved 2.3 Å resolution (Fig. 3a, b). This is an improvement compared to our previous best result at 2.5 Å using a 200 kV Talos Arctica cryo-TEM equipped with a Gatan K3 direct detector<sup>9</sup> and might be attributable to the use of a different camera and energy filtration. However, despite this improvement in the 200 kV-data, the result from the 300 kV-instrument was superior to the map derived from the 200 kV-data, notably from fewer micrographs (4,173 for the Krios G4, 7,907 for the Glacios 2) and within a shorter collection time (10 hours and 22 hours, respectively). To facilitate analysis of these data we computed reconstructions from data subsets and plotted the resulting resolutions (Fig. 3d, e).

We note that this result was obtained with a small (85 kDa) complex that lacks symmetry, a combination that is typically considered challenging<sup>16</sup>, and is therefore more representative of high-end biological use cases than experiments with model protein complexes. Results with large or highly symmetric specimens, where alignment accuracy is less limiting due to greater signal, may show different resolution gaps between the two instrument types. We also acknowledge that this comparison is primarily valid for the specific systems used, that the cold-FEG may contribute to the superior results from the 300 kV system, and that the DQE difference between 200 kV and 300 kV data may depend on the direct detector model used.

## Supplementary Note 2. Comparison of the impact of energy filtration on the quality of low-defocus cryo-EM data of a small complex

The importance of energy filtration as a means to remove inelastically scattered electrons from the electron beam arriving at the detector, thereby improving the signal-to-noise ratio by reducing electrons that only contribute to the noise but not the signal, is well-established for thick specimens, such as those routinely found in cryo-electron tomography experiments<sup>17</sup>. While many high-resolution single-particle structures obtained from thin specimens employed energy filtration as well<sup>18,19</sup>, there are few systematic tests that analyze the effect of energy filtration on the quality of data obtained from thin single-particle specimens of smaller complexes such as the CAK studied in this work. We therefore collected low-defocus (0.5-1.0  $\mu\text{m}$ ) data using the standard setup (Krios G4 with cold-FEG, Selectris X energy filter, and Falcon 4i detector) and then proceeded to collect another dataset on the same grid after retraction of the energy filtration slit. We obtained a resolution of 2.0  $\text{\AA}$  from the energy filtered data and 2.3  $\text{\AA}$  from the data after retraction of the slit (Fig. 3a). Data were processed as described for all other complexes (see Methods), except that additional instances of 2D classification were run to identify all suitable particles, and that only one round of Bayesian polishing was performed before the final refinement. Refinement of sub-sets showed that the energy filtered data also provide higher resolution for smaller dataset sizes, and that breaking the 2  $\text{\AA}$  barrier may be difficult without energy filtration for our specimen and data collection parameters (Fig. 3f, g).

We note that our experiment strongly supports a positive effect of energy filtration on the data quality of the 85 kDa human CAK collected at low defocus, but that further experiments are required to investigate if the conclusions drawn from this comparison can be extrapolated to other specimens, such as complexes of larger size, and different data collection parameters, such as higher defocus.

## Supplementary References

- 1 Rosenthal, P. B. & Henderson, R. Optimal determination of particle orientation, absolute hand, and contrast loss in single-particle electron cryomicroscopy. *J. Mol. Biol.* **333**, 721-745 (2003).
- 2 Andersen, G., Poterszman, A., Egly, J. M., Moras, D. & Thierry, J. C. The crystal structure of human cyclin H. *FEBS Lett.* **397**, 65-69 (1996).
- 3 Tsytlonok, M. *et al.* Dynamic anticipation by Cdk2/Cyclin A-bound p27 mediates signal integration in cell cycle regulation. *Nat. Commun.* **10**, 1676 (2019).
- 4 Pintilie, G. *et al.* Measurement of atom resolvability in cryo-EM maps with Q-scores. *Nat. Meth.* **17**, 328-334 (2020).
- 5 Hazel, P. *et al.* Inhibitor Selectivity for Cyclin-Dependent Kinase 7: A Structural, Thermodynamic, and Modelling Study. *ChemMedChem* **12**, 372-380 (2017).
- 6 Ali, S. *et al.* The development of a selective cyclin-dependent kinase inhibitor that shows antitumor activity. *Cancer Res.* **69**, 6208-6215 (2009).
- 7 Heathcote, D. A. *et al.* A Novel Pyrazolo[1,5-a]pyrimidine Is a Potent Inhibitor of Cyclin-Dependent Protein Kinases 1, 2, and 9, Which Demonstrates Antitumor Effects in Human Tumor Xenografts Following Oral Administration. *J. Med. Chem.* **53**, 8508-8522 (2010).
- 8 Bondke, A. *et al.* Pyrazolo[1,5-a]pyrimidine-5,7-diamine compounds as cdk inhibitors and their therapeutic use. U.S. patent US 9932344 B2 (2016).
- 9 Greber, B. J., Remis, J., Ali, S. & Nogales, E. 2.5Å-resolution structure of the human CDK-activating kinase bound to the clinical inhibitor ICEC0942. *Biophys J.* **120**, 677-686 (2021).
- 10 Herzik, M. A., Wu, M. & Lander, G. C. High-resolution structure determination of sub-100 kDa complexes using conventional cryo-EM. *Nat. Commun.* **10**, 1032 (2019).
- 11 Thangaratnarajah, C., Rheinberger, J. & Paulino, C. Cryo-EM studies of membrane proteins at 200 keV. *Curr. Opin. Struct. Biol.* **76**, 102440 (2022).
- 12 Wu, M., Lander, G. C. & Herzik, M. A. Sub-2 Angstrom resolution structure determination using single-particle cryo-EM at 200 keV. *J. Struct. Biol.: X* **4**, 100020 (2020).
- 13 Merk, A. *et al.* 1.8 Å resolution structure of β-galactosidase with a 200 kV CRYO ARM electron microscope. *IUCrJ* **7**, 639-643 (2020).
- 14 Punjani, A., Rubinstein, J. L., Fleet, D. J. & Brubaker, M. A. cryoSPARC: algorithms for rapid unsupervised cryo-EM structure determination. *Nat. Meth.* **14**, 290-296 (2017).

- 15 Kimanius, D., Dong, L., Sharov, G., Nakane, T. & Scheres, S. H. W. New tools for automated cryo-EM single-particle analysis in RELION-4.0. *Biochem J.* **478**, 4169-4185 (2021).
- 16 Merk, A. *et al.* Breaking Cryo-EM Resolution Barriers to Facilitate Drug Discovery. *Cell* **165**, 1698-1707 (2016).
- 17 Fukuda, Y., Laugks, U., Lučić, V., Baumeister, W. & Danev, R. Electron cryotomography of vitrified cells with a Volta phase plate. *J. Struct. Biol.* **190**, 143-154 (2015).
- 18 Nakane, T. *et al.* Single-particle cryo-EM at atomic resolution. *Nature* **587**, 152-156 (2020).
- 19 Yip, K. M., Fischer, N., Paknia, E., Chari, A. & Stark, H. Atomic-resolution protein structure determination by cryo-EM. *Nature* **587**, 157-161 (2020).
